# Supplementary material for: Slowly Making Sense: A Review of the Two-Step Venom System within Slow (Nycticebus spp.) and Pygmy Lorises (Xanthonycticebus spp.)
Source: Toxins (Basel). 2023 Aug 22;15(9):514. doi: 10.3390/toxins15090514 (PMC10536643; doi:10.3390/toxins15090514)
Supplement: Supplementary file 1 [file toxins-15-00514-s001.zip › Supplementary File S1 - BLAST and BGEsp.xlsx]

## Sheet: Query
Javan slow loris (Nycticebus javanicus)
Chain A	CPAVEKHANLFLKGTTDEFLNYAKNFKALPVVLENARILKNCVDAKMTEEDKENALSVLDKIYTSPLC
Chain B	VKSSAVLENAKQLKMCSDNKLTEEDKDNVQSGLDKIYSSNFCPIFYGVFGAIVTGDKNIIDSFIDKVSGTEPEKAAFENIQECFNEEGITGKTI

## Sheet: ChainA_Taxonomy
Taxonomy	Number of hits	Number of Organisms
Eutheria	132	79
. Boreoeutheria	131	78
.. Laurasiatheria	82	55
... Carnivora	53	34
.... Feliformia	29	14
..... Felidae	27	12
...... Felinae	22	7
....... Felis catus	15	1
....... Prionailurus	2	2
........ Prionailurus bengalensis	1	1
........ Prionailurus viverrinus	1	1
....... Leopardus geoffroyi	1	1
....... Puma yagouaroundi	1	1
....... Lynx	3	2
........ Lynx rufus	2	1
........ Lynx canadensis	1	1
...... Panthera	4	4
....... Panthera tigris	1	1
....... Panthera pardus	1	1
....... Panthera uncia	1	1
....... Panthera leo	1	1
...... Acinonyx jubatus	1	1
..... Suricata suricatta	1	1
..... Hyaena hyaena	1	1
.... Caniformia	24	20
..... Canidae	5	3
...... Vulpes	3	2
....... Vulpes lagopus	2	1
....... Vulpes vulpes	1	1
...... Nyctereutes procyonoides	2	1
..... Ursidae	3	2
...... Ursus americanus	1	1
...... Ailuropoda melanoleuca	2	1
..... Mustelidae	6	6
...... Gulo gulo	1	1
...... Lutrinae	2	2
....... Enhydra lutris kenyoni	1	1
....... Lontra canadensis	1	1
...... Mustelinae	3	3
....... Mustela	2	2
........ Mustela putorius furo	1	1
........ Mustela erminea	1	1
....... Neogale vison	1	1
..... Phocidae	6	6
...... Phoca vitulina	1	1
...... Halichoerus grypus	1	1
...... Neomonachus schauinslandi	1	1
...... Mirounga	2	2
....... Mirounga leonina	1	1
....... Mirounga angustirostris	1	1
...... Leptonychotes weddellii	1	1
..... Odobenus rosmarus divergens	1	1
..... Otariidae	3	2
...... Callorhinus ursinus	2	1
...... Eumetopias jubatus	1	1
... Vespertilionidae	8	6
.... Eptesicus fuscus	1	1
.... Pipistrellus kuhlii	2	1
.... Myotis	5	4
..... Myotis brandtii	1	1
..... Myotis lucifugus	2	1
..... Myotis davidii	1	1
..... Myotis myotis	1	1
... Equus	4	4
.... Equus przewalskii	1	1
.... Equus caballus	1	1
.... Equus quagga	1	1
.... Equus asinus	1	1
... Manis	3	2
.... Manis pentadactyla	1	1
.... Manis javanica	2	1
... Artiodactyla	14	9
.... Pecora	12	7
..... Moschus berezovskii	1	1
..... Bovidae	2	2
...... Bos taurus	1	1
...... Capra hircus	1	1
..... Cervidae	9	4
...... Muntiacus	5	2
....... Muntiacus muntjak	3	1
....... Muntiacus reevesi	2	1
...... Odocoileinae	4	2
....... Odocoileus virginianus texanus	2	1
....... Rangifer tarandus platyrhyncus	2	1
.... Camelidae	2	2
..... Vicugna pacos	1	1
..... Camelus ferus	1	1
.. Euarchontoglires	49	23
... Primates	6	4
.... Strepsirrhini	5	3
..... Nycticebus coucang	3	1
..... Lemuriformes	2	2
...... Lemur catta	1	1
...... Microcebus murinus	1	1
.... Chlorocebus sabaeus	1	1
... Glires	42	18
.... Rodentia	41	17
..... Sciuridae	6	5
...... Marmotini	5	4
....... Urocitellus parryii	1	1
....... Marmota	2	2
........ Marmota marmota marmota	1	1
........ Marmota flaviventris	1	1
....... Ictidomys tridecemlineatus	2	1
...... Sciurus carolinensis	1	1
..... Murinae	33	10
...... Mus	26	7
....... Mus	24	6
........ Mus musculus	14	4
......... Mus musculus castaneus	2	1
......... Mus musculus domesticus	3	1
......... Mus musculus musculus	1	1
........ Mus spretus	1	1
........ Mus caroli	3	1
....... Mus pahari	2	1
...... Rattus	6	2
....... Rattus rattus	2	1
....... Rattus norvegicus	4	1
...... Mastomys coucha	1	1
..... Hystricomorpha	2	2
...... Fukomys damarensis	1	1
...... Cavia porcellus	1	1
.... Ochotona curzoniae	1	1
... Galeopterus variegatus	1	1
. Dasypus novemcinctus	1	1

## Sheet: ChainA_Descriptions
Description	Scientific Name	Max Score	Total Score	Query Cover	E value	Per. ident	Acc. Len	Accession
RecName: Full=Major allergen I polypeptide chain 1; AltName: Full=AG4; AltName: Full=Allergen Cat-1; AltName: Full=Allergen Fel d I-A; Short=Allergen FdI; Short=Allergen Fel dI; AltName: Allergen=Fel d 1-A; Flags: Precursor [Felis catus]	Felis catus	112	112	1	4e-30	7794	92	P30438.2
major allergen I polypeptide chain 1 precursor [Felis catus]	Felis catus	110	110	1	9e-30	7647	88	NP_001041618.1
major allergen I polypeptide chain 1 isoform X1 [Felis catus]	Felis catus	110	110	1	1e-29	7647	92	XP_044901353.1
fel d I chain 1 precursor with leader B [Felis catus]	Felis catus	109	109	1	2e-29	7647	88	CAA44343.1
fel d I chain 1 precursor with leader A [Felis catus]	Felis catus	110	110	1	3e-29	7647	92	CAA44344.1
Crystal structure of the major cat allergen Fel d 1 (1+2) [Felis catus]	Felis catus	111	111	1	4e-29	7647	153	1ZKR_A
Crystal structure of Fel d 1- the major cat allergen [Felis catus]	Felis catus	111	111	1	6e-29	7647	170	1PUO_A
Structure of single chain Fel d 1 bound to a neutralizing antibody [Felis catus]	Felis catus	112	112	1	7e-29	7647	199	5VYF_C
major allergen I polypeptide chain 1-like [Nycticebus coucang]	Nycticebus coucang	998	998	1	3e-25	7206	92	XP_053462159.1
major allergen I polypeptide chain 1 [Panthera tigris]	Panthera tigris	986	986	1	8e-25	6912	88	XP_007096806.1
major allergen I polypeptide chain 1 [Panthera pardus]	Panthera pardus	978	978	1	1e-24	6765	92	XP_019278942.2
major allergen I polypeptide chain 1 [Prionailurus bengalensis]	Prionailurus bengalensis	978	978	1	1e-24	6765	92	XP_043454992.1
major allergen I polypeptide chain 1 [Leopardus geoffroyi]	Leopardus geoffroyi	978	978	1	2e-24	6912	92	XP_045298455.1
major allergen I polypeptide chain 1 [Puma yagouaroundi]	Puma yagouaroundi	974	974	1	2e-24	6912	92	XP_040302122.1
major allergen I polypeptide chain 1 isoform X1 [Lynx rufus]	Lynx rufus	967	967	1	4e-24	6912	92	XP_046934163.1
major allergen I polypeptide chain 1 [Panthera uncia]	Panthera uncia	967	967	1	5e-24	6618	92	XP_049477031.1
major allergen I polypeptide chain 1 [Panthera leo]	Panthera leo	967	967	1	5e-24	6765	92	XP_042775111.1
major allergen I polypeptide chain 1 isoform X2 [Lynx rufus]	Lynx rufus	963	963	1	6e-24	6912	88	XP_046934164.1
LOW QUALITY PROTEIN: major allergen I polypeptide chain 1-like [Lynx canadensis]	Lynx canadensis	955	955	1	1e-23	6765	92	XP_030154886.1
major allergen I polypeptide chain 1-like [Nycticebus coucang]	Nycticebus coucang	944	944	1	3e-23	6765	92	XP_053462160.1
major allergen I polypeptide chain 1-like [Acinonyx jubatus]	Acinonyx jubatus	940	940	1	6e-23	6618	92	XP_014928582.1
major allergen I polypeptide chain 1-like [Chlorocebus sabaeus]	Chlorocebus sabaeus	917	917	1	3e-22	6176	77	XP_007994465.1
major allergen I polypeptide chain 1-like isoform X2 [Lemur catta]	Lemur catta	878	878	1	2e-20	5735	114	XP_045388340.1
major allergen I polypeptide chain 1-like isoform X2 [Vulpes lagopus]	Vulpes lagopus	870	870	1	2e-20	5441	86	XP_041599793.1
major allergen I polypeptide chain 1-like [Nyctereutes procyonoides]	Nyctereutes procyonoides	870	870	1	3e-20	5588	92	XP_055165579.1
major allergen I polypeptide chain 1-like isoform X1 [Vulpes lagopus]	Vulpes lagopus	870	870	1	3e-20	5441	92	XP_041599792.1
major allergen I polypeptide chain 1-like isoform X3 [Vulpes vulpes]	Vulpes vulpes	867	867	1	5e-20	5294	92	XP_025865930.1
major allergen I polypeptide chain 1-like [Urocitellus parryii]	Urocitellus parryii	859	859	1	8e-20	5735	92	XP_026246981.1
major allergen I polypeptide chain 1-like [Marmota marmota marmota]	Marmota marmota marmota	859	859	1	9e-20	5588	92	XP_015352555.1
major allergen I polypeptide chain 1-like [Suricata suricatta]	Suricata suricatta	855	855	1	1e-19	6029	92	XP_029781591.1
major allergen I polypeptide chain 1-like [Ictidomys tridecemlineatus]	Ictidomys tridecemlineatus	851	851	1	2e-19	5588	92	XP_021585770.1
major allergen I polypeptide chain 1-like [Ursus americanus]	Ursus americanus	843	843	1	4e-19	5588	92	XP_045652195.1
major allergen I polypeptide chain 1-like [Hyaena hyaena]	Hyaena hyaena	843	843	1	4e-19	5588	95	XP_039087888.1
PREDICTED: major allergen I polypeptide chain 1-like [Galeopterus variegatus]	Galeopterus variegatus	840	840	1	6e-19	5735	92	XP_008572923.1
major allergen I polypeptide chain 1-like [Dasypus novemcinctus]	Dasypus novemcinctus	836	836	1	7e-19	5588	92	XP_004462325.1
major allergen I polypeptide chain 1-like [Microcebus murinus]	Microcebus murinus	843	843	1	7e-19	5588	114	XP_012630564.1
major allergen I polypeptide chain 1-like [Eptesicus fuscus]	Eptesicus fuscus	832	832	1	9e-19	5441	92	XP_027998850.2
major allergen I polypeptide chain 1-like [Ochotona curzoniae]	Ochotona curzoniae	832	832	1	1e-18	5294	93	XP_040832409.1
major allergen I polypeptide chain 1-like [Nycticebus coucang]	Nycticebus coucang	820	820	1	3e-18	5882	92	XP_053462158.1
unnamed protein product [Gulo gulo]	Gulo gulo	836	836	1	3e-18	5441	141	VCW57428.1
PREDICTED: major allergen I polypeptide chain 1-like [Equus przewalskii]	Equus przewalskii	816	816	1	4e-18	5441	92	XP_008513295.1
major allergen I polypeptide chain 1-like [Phoca vitulina]	Phoca vitulina	813	813	1	4e-18	5294	80	XP_032246533.1
major allergen I polypeptide chain 1 isoform X2 [Pipistrellus kuhlii]	Pipistrellus kuhlii	813	813	1	6e-18	5441	92	XP_036297093.1
major allergen I polypeptide chain 1-like [Equus quagga]	Equus quagga	809	809	1	9e-18	5294	92	XP_046536281.1
major allergen I polypeptide chain 1-like [Enhydra lutris kenyoni]	Enhydra lutris kenyoni	809	809	1	1e-17	5294	92	XP_022380683.1
major allergen I polypeptide chain 1 [Mustela putorius furo]	Mustela putorius furo	805	805	1	1e-17	5147	92	XP_004765237.1
major allergen I polypeptide chain 1-like [Lontra canadensis]	Lontra canadensis	805	805	1	1e-17	5294	92	XP_032697865.1
major allergen I polypeptide chain 1-like [Mustela erminea]	Mustela erminea	805	805	1	1e-17	5147	92	XP_032181719.1
PREDICTED: major allergen I polypeptide chain 1-like isoform X3 [Myotis brandtii]	Myotis brandtii	801	801	1	2e-17	5147	92	XP_014392095.1
major allergen I polypeptide chain 1-like isoform X2 [Myotis lucifugus]	Myotis lucifugus	801	801	1	2e-17	5147	92	XP_014305586.1
major allergen I polypeptide chain 1-like [Halichoerus grypus]	Halichoerus grypus	793	793	1	3e-17	5147	92	XP_035964405.1
major allergen I polypeptide chain 1-like [Equus asinus]	Equus asinus	793	793	1	4e-17	5147	92	XP_014693669.1
major allergen I polypeptide chain 1-like isoform X2 [Neomonachus schauinslandi]	Neomonachus schauinslandi	793	793	1	4e-17	5147	92	XP_021556752.1
major allergen I polypeptide chain 1-like [Leptonychotes weddellii]	Leptonychotes weddellii	790	790	1	5e-17	5147	92	XP_006730813.1
major allergen I polypeptide chain 1-like [Manis pentadactyla]	Manis pentadactyla	786	786	1	7e-17	5000	92	XP_036764627.1
major allergen I polypeptide chain 1-like [Sciurus carolinensis]	Sciurus carolinensis	786	786	1	7e-17	5000	92	XP_047385618.1
major allergen I polypeptide chain 1 isoform X2 [Ailuropoda melanoleuca]	Ailuropoda melanoleuca	778	778	1	1e-16	5147	92	XP_019661459.1
ABPA12b [Mus musculus castaneus]	Mus musculus castaneus	778	778	1	2e-16	4853	93	QNT60499.1
major allergen I polypeptide chain 1-like isoform X2 [Moschus berezovskii]	Moschus berezovskii	774	774	1	2e-16	5147	92	XP_055268257.1
major allergen I polypeptide chain 1 isoform X1 [Ailuropoda melanoleuca]	Ailuropoda melanoleuca	782	782	1	2e-16	5147	114	XP_019661458.1
major allergen I polypeptide chain 1-like [Neogale vison]	Neogale vison	774	774	1	2e-16	5000	92	XP_044116374.1
major allergen I polypeptide chain 1-like isoform X4 [Vicugna pacos]	Vicugna pacos	793	793	1	3e-16	5294	174	XP_031527914.1
major allergen I polypeptide chain 1-like [Rattus rattus]	Rattus rattus	770	770	1	3e-16	4706	92	XP_032752034.1
major allergen I polypeptide chain 1 [Fukomys damarensis]	Fukomys damarensis	766	766	1	4e-16	5294	92	XP_019064189.1
PREDICTED: major allergen I polypeptide chain 1-like isoform X3 [Myotis davidii]	Myotis davidii	766	766	1	5e-16	4853	92	XP_015416663.1
androgen-binding protein precursor [Mus musculus]	Mus musculus	763	763	1	6e-16	4853	93	NP_001242995.1
PREDICTED: LOW QUALITY PROTEIN: major allergen I polypeptide chain 1-like [Odobenus rosmarus divergens]	Odobenus rosmarus divergens	763	763	1	6e-16	5147	92	XP_012422604.1
ABPA7 [Mus musculus musculus]	Mus musculus musculus	759	759	1	7e-16	4853	93	QPZ87458.1
major allergen I polypeptide chain 1-like isoform X6 [Callorhinus ursinus]	Callorhinus ursinus	755	755	1	9e-16	5000	79	XP_025710405.1
ABPA12b [Mus spretus]	Mus spretus	759	759	1	9e-16	4706	93	QJS38994.1
major allergen I polypeptide chain 1-like [Camelus ferus]	Camelus ferus	755	755	1	9e-16	5147	92	XP_032342059.1
major allergen I polypeptide chain 1-like isoform X4 [Callorhinus ursinus]	Callorhinus ursinus	755	755	1	1e-15	5000	92	XP_025710403.1
androgen-binding protein-like precursor [Mus musculus]	Mus musculus	755	755	1	1e-15	4706	93	NP_001257472.1
LOW QUALITY PROTEIN: major allergen I polypeptide chain 1-like [Prionailurus viverrinus]	Prionailurus viverrinus	755	755	0.86	1e-15	6271	92	XP_047690593.1
TPA: fel d I chain 1 precursor with leader A-like [Bos taurus]	Bos taurus	751	751	1	1e-15	5147	92	DAA19849.1
hypothetical protein mMyoMyo1_002757 [Myotis myotis]	Myotis myotis	751	751	1	2e-15	4706	92	KAF6285408.1
hypothetical protein FD754_023907 [Muntiacus muntjak]	Muntiacus muntjak	751	751	1	2e-15	4853	93	KAB0339433.1
major allergen I polypeptide chain 1-like [Cavia porcellus]	Cavia porcellus	747	747	1	2e-15	4853	92	XP_013005190.1
ABPAL [Mus caroli]	Mus caroli	739	739	1	2e-15	4706	71	QJS38976.1
major allergen I polypeptide chain 1-like [Manis javanica]	Manis javanica	747	747	1	2e-15	4706	92	XP_017527877.1
major allergen I polypeptide chain 1-like isoform X1 [Odocoileus virginianus texanus]	Odocoileus virginianus texanus	747	747	1	2e-15	5147	92	XP_020770227.1
hypothetical protein FD755_004582 [Muntiacus reevesi]	Muntiacus reevesi	747	747	1	3e-15	4853	93	KAB0382665.1
ABP alpha [Rattus norvegicus]	Rattus norvegicus	739	739	1	3e-15	4559	70	AAW47994.1
major allergen I polypeptide chain 1-like isoform X2 [Odocoileus virginianus texanus]	Odocoileus virginianus texanus	739	739	1	3e-15	5147	77	XP_020770228.1
androgen-binding protein precursor [Mus musculus]	Mus musculus	743	743	1	3e-15	4706	93	NP_001243002.1
PREDICTED: LOW QUALITY PROTEIN: major allergen I polypeptide chain 1-like [Capra hircus]	Capra hircus	739	739	1	4e-15	5000	92	XP_017917793.1
hypothetical protein FD754_017003 [Muntiacus muntjak]	Muntiacus muntjak	739	739	1	4e-15	5000	92	KAB0352146.1
hypothetical protein FD755_003544 [Muntiacus reevesi]	Muntiacus reevesi	739	739	1	4e-15	5000	92	KAB0381627.1
secretoglobin, family 1B, member 30 precursor [Rattus norvegicus]	Rattus norvegicus	739	739	1	4e-15	4559	92	NP_001094329.1
unnamed protein product [Rangifer tarandus platyrhyncus]	Rangifer tarandus platyrhyncus	739	739	1	5e-15	5000	93	CAI9161780.1
major allergen I polypeptide chain 1-like [Rattus rattus]	Rattus rattus	736	736	1	6e-15	4559	92	XP_032752038.1
major allergen I polypeptide chain 1-like [Mus caroli]	Mus caroli	736	736	1	7e-15	4559	93	XP_021024436.1
major allergen I polypeptide chain 1-like [Mastomys coucha]	Mastomys coucha	732	732	1	9e-15	4706	92	XP_031242022.1
uncharacterized protein LOC668381 precursor [Mus musculus]	Mus musculus	728	728	1	1e-14	4559	93	NP_001297562.1
major allergen I polypeptide chain 1-like [Mus pahari]	Mus pahari	728	728	1	1e-14	4706	92	XP_021076491.1
lachrymal protein [Rattus norvegicus]	Rattus norvegicus	720	720	1	2e-14	4412	70	AAW47993.1
uncharacterized protein LOC668381 isoform X1 [Mus musculus]	Mus musculus	728	728	1	2e-14	4559	101	XP_030098761.1
major allergen I polypeptide chain 1-like [Eumetopias jubatus]	Eumetopias jubatus	724	724	1	2e-14	4853	92	XP_027979502.1
secretoglobin, family 1B, member 19 precursor [Mus musculus]	Mus musculus	724	724	1	2e-14	4559	93	NP_001268455.1
hypothetical protein FD754_014500 [Muntiacus muntjak]	Muntiacus muntjak	724	724	1	2e-14	4706	93	KAB0349643.1

## Sheet: ChainB_Taxonomy
Taxonomy	Number of hits	Number of Organisms
cellular organisms	117	78
. Eutheria	116	77
.. Boreoeutheria	114	76
... Euarchontoglires	22	12
.... Strepsirrhini	10	4
..... Lorisiformes	7	2
...... Nycticebus coucang	6	1
...... Otolemur garnettii	1	1
..... Lemuriformes	3	2
...... Lemur catta	2	1
...... Microcebus murinus	1	1
.... Glires	12	8
..... Rodentia	9	6
...... Sciuridae	6	3
....... Sciurus carolinensis	2	1
....... Marmotini	4	2
........ Ictidomys tridecemlineatus	3	1
........ Marmota marmota marmota	1	1
...... Heteromyidae	2	2
....... Perognathus longimembris pacificus	1	1
....... Dipodomys spectabilis	1	1
...... Fukomys damarensis	1	1
..... Lagomorpha	3	2
...... Ochotona curzoniae	2	1
...... Oryctolagus cuniculus	1	1
... Laurasiatheria	92	64
.... Carnivora	37	31
..... Feliformia	14	11
...... Felidae	13	10
....... Felinae	9	6
........ Felis catus	4	1
........ Puma	2	2
......... Puma concolor	1	1
......... Puma yagouaroundi	1	1
........ Lynx rufus	1	1
........ Leopardus geoffroyi	1	1
........ Prionailurus bengalensis	1	1
....... Panthera	4	4
........ Panthera leo	1	1
........ Panthera pardus	1	1
........ Panthera tigris	1	1
........ Panthera uncia	1	1
...... Suricata suricatta	1	1
..... Caniformia	23	20
...... Phocidae	7	6
....... Phoca vitulina	1	1
....... Leptonychotes weddellii	1	1
....... Mirounga	3	2
........ Mirounga leonina	2	1
........ Mirounga angustirostris	1	1
....... Neomonachus schauinslandi	1	1
....... Halichoerus grypus	1	1
...... Otariidae	3	3
....... Eumetopias jubatus	1	1
....... Callorhinus ursinus	1	1
....... Zalophus californianus	1	1
...... Mustelidae	8	8
....... Mustelinae	3	3
........ Mustela	2	2
......... Mustela erminea	1	1
......... Mustela putorius furo	1	1
........ Neogale vison	1	1
....... Meles meles	1	1
....... Gulo gulo	1	1
....... Lutrinae	3	3
........ Lontra canadensis	1	1
........ Enhydra lutris kenyoni	1	1
........ Lutra lutra	1	1
...... Odobenus rosmarus divergens	1	1
...... Ursidae	4	2
....... Ailuropoda melanoleuca	3	1
....... Ursus americanus	1	1
.... Vespertilionidae	7	5
..... Myotis	6	4
...... Myotis brandtii	2	1
...... Myotis davidii	1	1
...... Myotis lucifugus	2	1
...... Myotis myotis	1	1
..... Eptesicus fuscus	1	1
.... Artiodactyla	38	20
..... Camelidae	7	4
...... Camelus	6	3
....... Camelus dromedarius	2	1
....... Camelus bactrianus	2	1
....... Camelus ferus	2	1
...... Vicugna pacos	1	1
..... Pecora	31	16
...... Bovidae	21	11
....... Bovinae	16	7
........ Bubalus	6	2
......... Bubalus bubalis	4	1
......... Bubalus carabanensis	2	1
........ Bos	9	4
......... Bos mutus	2	1
......... Bos taurus	3	1
......... Bos indicus	2	1
......... Bos indicus x Bos taurus	2	1
........ Bison bison bison	1	1
....... Caprinae	4	3
........ Ovis	3	2
......... Ovis aries	2	1
......... Ovis ammon polii	1	1
........ Capra hircus	1	1
....... Oryx dammah	1	1
...... Cervidae	10	5
....... Odocoileinae	5	2
........ Rangifer tarandus platyrhyncus	3	1
........ Odocoileus virginianus texanus	2	1
....... Cervus	5	3
........ Cervus canadensis	2	1
........ Cervus elaphus	2	2
......... Cervus elaphus hippelaphus	1	1
.... Manis	3	2
..... Manis javanica	2	1
..... Manis pentadactyla	1	1
.... Perissodactyla	7	6
..... Rhinocerotidae	2	2
...... Diceros bicornis minor	1	1
...... Ceratotherium simum simum	1	1
..... Equus	5	4
...... Equus asinus	1	1
...... Equus przewalskii	2	1
...... Equus caballus	1	1
...... Equus quagga	1	1
.. Dasypus novemcinctus	2	1
. Pseudomonas fragi	1	1

## Sheet: ChainB_Descriptions
Description	Scientific Name	Max Score	Total Score	Query Cover	E value	Per. ident	Acc. Len	Accession
androgen-binding protein homolog isoform X1 [Nycticebus coucang]	Nycticebus coucang	928	928	0.56	8e-22	7547	114	XP_053461621.1
androgen-binding protein homolog isoform X2 [Nycticebus coucang]	Nycticebus coucang	924	924	0.56	1e-21	7547	107	XP_053461623.1
Crystal structure of the major cat allergen Fel d 1 (1+2) [Felis catus]	Felis catus	924	924	0.95	4e-21	4639	153	1ZKR_A
major allergen I polypeptide chain 1-like [Nycticebus coucang]	Nycticebus coucang	855	855	0.44	3e-19	10000	92	XP_053462159.1
major allergen I polypeptide chain 1-like [Nycticebus coucang]	Nycticebus coucang	813	813	0.44	2e-17	9286	92	XP_053462158.1
androgen-binding protein homolog [Nycticebus coucang]	Nycticebus coucang	816	816	0.6	2e-17	5965	114	XP_053462162.1
major allergen I polypeptide chain 1-like [Nycticebus coucang]	Nycticebus coucang	805	805	0.44	3e-17	9286	92	XP_053462160.1
PREDICTED: major allergen I polypeptide chain 2-like [Myotis brandtii]	Myotis brandtii	728	728	0.56	6e-14	5472	108	XP_014392096.1
major allergen I polypeptide chain 2-like [Eptesicus fuscus]	Eptesicus fuscus	720	720	0.62	9e-14	5254	107	XP_054566838.1
PREDICTED: major allergen I polypeptide chain 2-like [Myotis davidii]	Myotis davidii	709	709	0.56	3e-13	5283	108	XP_015416664.1
major allergen I polypeptide chain 2-like [Myotis lucifugus]	Myotis lucifugus	705	705	0.56	5e-13	5283	108	XP_014305584.1
major allergen I polypeptide chain 2-like [Sciurus carolinensis]	Sciurus carolinensis	697	697	0.56	8e-13	5283	102	XP_047383121.1
major allergen I polypeptide chain 2-like [Phoca vitulina]	Phoca vitulina	697	697	0.56	8e-13	5283	107	XP_032246532.1
major allergen I polypeptide chain 2-like [Leptonychotes weddellii]	Leptonychotes weddellii	697	697	0.56	8e-13	5283	107	XP_006730827.1
major allergen I polypeptide chain 2-like [Neomonachus schauinslandi]	Neomonachus schauinslandi	693	693	0.56	1e-12	5283	107	XP_021556767.1
Major allergen I polypeptide chain 2 [Camelus dromedarius]	Camelus dromedarius	686	686	0.54	2e-12	5294	93	KAB1273449.1
major allergen I polypeptide chain 2-like [Camelus bactrianus]	Camelus bactrianus	689	689	0.56	2e-12	5094	115	XP_010948451.2
Zinc finger protein 548 [Sciurus carolinensis]	Sciurus carolinensis	732	732	0.62	2e-12	4915	594	MBZ3885305.1
major allergen I polypeptide chain 2-like [Vicugna pacos]	Vicugna pacos	689	689	0.56	2e-12	5094	115	XP_015105668.1
PREDICTED: major allergen I polypeptide chain 2-like [Camelus bactrianus]	Camelus bactrianus	697	697	0.54	2e-12	5294	148	XP_010948451.1
major allergen I polypeptide chain 2-like [Eumetopias jubatus]	Eumetopias jubatus	682	682	0.56	4e-12	5283	107	XP_027979500.1
hypothetical protein CB1_000753010 [Camelus ferus]	Camelus ferus	693	693	0.54	4e-12	5294	161	EPY81162.1
major allergen I polypeptide chain 2-like [Myotis myotis]	Myotis myotis	682	682	0.56	4e-12	5094	108	XP_036202244.1
major allergen I polypeptide chain 2-like [Halichoerus grypus]	Halichoerus grypus	678	678	0.56	4e-12	5094	107	XP_035964404.1
major allergen I polypeptide chain 2-like [Suricata suricatta]	Suricata suricatta	674	674	0.52	4e-12	5306	91	XP_029781592.1
major allergen I polypeptide chain 2-like isoform X1 [Callorhinus ursinus]	Callorhinus ursinus	662	662	0.56	2e-11	5094	107	XP_025710187.1
LOW QUALITY PROTEIN: androgen-binding protein homolog [Otolemur garnettii]	Otolemur garnettii	674	674	0.56	2e-11	5094	165	XP_023372660.1
androgen-binding protein homolog isoform X2 [Lemur catta]	Lemur catta	659	659	0.61	3e-11	4138	113	XP_045388342.1
major allergen I polypeptide chain 2-like [Manis javanica]	Manis javanica	659	659	0.62	4e-11	4407	114	XP_017527875.1
major allergen I polypeptide chain 2-like isoform X1 [Lemur catta]	Lemur catta	659	659	0.56	4e-11	4528	114	XP_045388341.1
major allergen I polypeptide chain 2-like [Mustela erminea]	Mustela erminea	655	655	0.56	4e-11	5094	107	XP_032181399.1
major allergen I polypeptide chain 2-like [Meles meles]	Meles meles	659	659	0.5	5e-11	5532	135	XP_045842702.1
major allergen I polypeptide chain 2-like [Zalophus californianus]	Zalophus californianus	651	651	0.56	5e-11	5094	107	XP_027473872.1
major allergen I polypeptide chain 2-like [Ictidomys tridecemlineatus]	Ictidomys tridecemlineatus	647	647	0.61	7e-11	4138	101	XP_021585769.1
androgen-binding protein homolog [Perognathus longimembris pacificus]	Perognathus longimembris pacificus	647	647	0.62	8e-11	4407	102	XP_048185910.1
major allergen I polypeptide chain 2-like, transcript variant X1 [Ictidomys tridecemlineatus]	Ictidomys tridecemlineatus	643	643	0.56	9e-11	4528	102	KAG3255812.1
hypothetical protein HPG69_012602 [Diceros bicornis minor]	Diceros bicornis minor	647	647	0.56	2e-10	5283	148	KAF5924348.1
major allergen I polypeptide chain 2 [Puma concolor]	Puma concolor	635	635	0.56	2e-10	4717	109	XP_025769992.1
major allergen I polypeptide chain 2-like isoform X2 [Bubalus bubalis]	Bubalus bubalis	632	632	0.56	3e-10	4528	106	XP_044788137.2
PREDICTED: major allergen I polypeptide chain 2-like [Odobenus rosmarus divergens]	Odobenus rosmarus divergens	632	632	0.55	3e-10	5000	107	XP_004413808.1
major allergen I polypeptide chain 2-like [Ovis aries]	Ovis aries	632	632	0.54	4e-10	4902	106	XP_012045542.1
major allergen I polypeptide chain 2-like [Neogale vison]	Neogale vison	632	632	0.54	4e-10	5098	107	XP_044116375.1
major allergen I polypeptide chain 2-like [Oryx dammah]	Oryx dammah	624	624	0.56	4e-10	4717	89	XP_040109042.1
major allergen I polypeptide chain 2-like isoform X3 [Bubalus bubalis]	Bubalus bubalis	628	628	0.56	5e-10	4528	115	XP_006046605.1
unnamed protein product [Gulo gulo]	Gulo gulo	620	620	0.56	6e-10	5094	92	VCW57431.1
major allergen I polypeptide chain 2 [Mustela putorius furo]	Mustela putorius furo	624	624	0.56	6e-10	4906	107	XP_004765236.1
hypothetical protein [Bos mutus]	Bos mutus	616	616	0.6	7e-10	4035	86	MXQ83560.1
major allergen I polypeptide chain 2-like [Ochotona curzoniae]	Ochotona curzoniae	624	624	0.67	8e-10	4286	113	XP_040832408.1
Androgen-binding protein-like protein [Bos mutus]	Bos mutus	620	620	0.56	8e-10	4340	104	ELR47578.1
hypothetical protein PANDA_014685 [Ailuropoda melanoleuca]	Ailuropoda melanoleuca	608	608	0.56	1e-09	4717	66	EFB17628.1
androgen-binding protein homolog [Bos taurus]	Bos taurus	620	620	0.6	1e-09	4035	118	XP_010813267.1
major allergen I polypeptide chain 2 isoform X2 [Ailuropoda melanoleuca]	Ailuropoda melanoleuca	620	620	0.56	1e-09	4717	107	XP_034528505.1
major allergen I polypeptide chain 2-like isoform X1 [Bubalus bubalis]	Bubalus bubalis	632	632	0.56	1e-09	4528	159	XP_044788136.2
major allergen I polypeptide chain 2-like [Marmota marmota marmota]	Marmota marmota marmota	616	616	0.61	1e-09	3966	101	XP_048647170.1
PREDICTED: major allergen I polypeptide chain 2-like [Ceratotherium simum simum]	Ceratotherium simum simum	616	616	0.56	1e-09	4906	113	XP_014650263.1
PREDICTED: major allergen I polypeptide chain 2-like [Bison bison bison]	Bison bison bison	616	616	0.56	1e-09	4340	115	XP_010847263.1
major allergen I polypeptide chain 2-like [Microcebus murinus]	Microcebus murinus	616	616	0.5	2e-09	5319	114	XP_012630565.1
major allergen I polypeptide chain 2-like [Lontra canadensis]	Lontra canadensis	612	612	0.51	2e-09	5208	107	XP_032697924.1
major allergen I polypeptide chain 2 isoform X1 [Ailuropoda melanoleuca]	Ailuropoda melanoleuca	612	612	0.56	2e-09	4717	116	XP_011230571.3
major allergen I polypeptide chain 2 [Puma yagouaroundi]	Puma yagouaroundi	605	605	0.56	3e-09	4528	109	XP_040302121.1
major allergen I polypeptide chain 2-like [Equus asinus]	Equus asinus	608	608	0.54	3e-09	4706	114	XP_014693670.1
androgen-binding protein homolog [Ochotona curzoniae]	Ochotona curzoniae	605	605	0.56	3e-09	4528	109	XP_040832488.1
major allergen I polypeptide chain 2 [Oryctolagus cuniculus]	Oryctolagus cuniculus	605	605	0.67	5e-09	3968	121	XP_051684380.1
major allergen I polypeptide chain 2-like [Ursus americanus]	Ursus americanus	605	605	0.56	7e-09	4717	141	XP_045652170.1
major allergen I polypeptide chain 2-like isoform X1 [Dasypus novemcinctus]	Dasypus novemcinctus	589	589	0.62	9e-09	3729	93	XP_004462326.2
androgen-binding protein homolog [Bubalus carabanensis]	Bubalus carabanensis	597	597	0.58	9e-09	4364	115	XP_055410296.1
major allergen I polypeptide chain 2 [Lynx rufus]	Lynx rufus	593	593	0.51	1e-08	4792	109	XP_046934969.1
hypothetical protein MG293_015302 [Ovis ammon polii]	Ovis ammon polii	616	616	0.54	1e-08	4902	224	KAI4534442.1
hypothetical protein JEQ12_005190 [Ovis aries]	Ovis aries	612	612	0.54	1e-08	4902	225	KAG5200656.1
hypothetical protein K5549_021593 [Capra hircus]	Capra hircus	585	585	0.53	1e-08	4800	83	KAJ1073632.1
Androgen-binding protein like protein [Fukomys damarensis]	Fukomys damarensis	585	585	0.56	1e-08	5094	96	KFO32365.1
secretoglobin family 2B member 2-like [Dipodomys spectabilis]	Dipodomys spectabilis	589	589	0.58	1e-08	4545	104	XP_042523741.1
PREDICTED: major allergen I polypeptide chain 2-like isoform X1 [Equus przewalskii]	Equus przewalskii	589	589	0.54	1e-08	4510	114	XP_008513296.1
unnamed protein product [Rangifer tarandus platyrhyncus]	Rangifer tarandus platyrhyncus	593	593	0.54	1e-08	4902	117	CAI9697268.1
major allergen I polypeptide chain 2 [Leopardus geoffroyi]	Leopardus geoffroyi	589	589	0.56	1e-08	4340	109	XP_045298454.1
PREDICTED: major allergen I polypeptide chain 2-like isoform X2 [Equus przewalskii]	Equus przewalskii	585	585	0.54	1e-08	4510	92	XP_008513297.1
major allergen I polypeptide chain 2-like isoform X2 [Odocoileus virginianus texanus]	Odocoileus virginianus texanus	585	585	0.54	2e-08	4510	105	XP_020725501.1
major allergen I polypeptide chain 2 [Prionailurus bengalensis]	Prionailurus bengalensis	585	585	0.56	2e-08	4340	109	XP_043454990.1
unnamed protein product [Rangifer tarandus platyrhyncus]	Rangifer tarandus platyrhyncus	589	589	0.54	2e-08	4510	114	CAI9697265.1
major allergen I polypeptide chain 2-like [Equus quagga]	Equus quagga	589	589	0.54	2e-08	4510	119	XP_046536280.1
secretoglobin family 2B member 2-like isoform X1 [Cervus canadensis]	Cervus canadensis	589	589	0.54	2e-08	4902	117	XP_043292823.1
secretoglobin family 2B member 2-like isoform X1 [Cervus elaphus]	Cervus elaphus	585	585	0.54	2e-08	4902	117	XP_043755051.1
hypothetical protein Celaphus_00004356 [Cervus elaphus hippelaphus]	Cervus elaphus hippelaphus	585	585	0.54	2e-08	4902	117	OWK16083.1
major allergen I polypeptide chain 2-like [Enhydra lutris kenyoni]	Enhydra lutris kenyoni	585	585	0.56	2e-08	4717	107	XP_022380682.1
androgen-binding protein homolog isoform X2 [Dasypus novemcinctus]	Dasypus novemcinctus	582	582	0.56	2e-08	3962	92	XP_023445667.1
secretoglobin family 2B member 2-like [Odocoileus virginianus texanus]	Odocoileus virginianus texanus	585	585	0.54	2e-08	4902	117	XP_020724618.1
unnamed protein product [Rangifer tarandus platyrhyncus]	Rangifer tarandus platyrhyncus	589	589	0.54	2e-08	4902	135	CAI9161781.1
major allergen I polypeptide chain 2-like [Lutra lutra]	Lutra lutra	582	582	0.55	2e-08	4808	107	XP_047565644.1
Dynein Heavy Chain 1, Axonemal [Manis pentadactyla]	Manis pentadactyla	585	585	0.62	2e-08	4068	114	KAI5180288.1
androgen binding protein beta-like precursor [Bos taurus]	Bos taurus	585	585	0.58	2e-08	4364	115	NP_001193735.1
secretoglobin family 2B member 2-like isoform X2 [Cervus canadensis]	Cervus canadensis	585	585	0.54	3e-08	4902	114	XP_043292824.1
PREDICTED: secretoglobin family 2B member 2-like [Bos indicus]	Bos indicus	585	585	0.58	3e-08	4364	115	XP_019834414.1
secretoglobin family 2B member 2-like isoform X2 [Cervus elaphus]	Cervus elaphus	585	585	0.54	3e-08	4902	114	XP_043755052.1
major allergen I polypeptide chain 2-like [Panthera leo]	Panthera leo	582	582	0.56	3e-08	4151	109	XP_042775100.1
major allergen I polypeptide chain 2-like [Panthera pardus]	Panthera pardus	582	582	0.56	3e-08	4151	109	XP_019278941.2
major allergen I polypeptide chain 2 [Bubalus bubalis]	Bubalus bubalis	585	585	0.54	3e-08	4706	132	XP_044788138.1
major allergen I polypeptide chain 2 [Panthera tigris]	Panthera tigris	578	578	0.56	4e-08	4151	109	XP_007096807.1
major allergen I polypeptide chain 2 [Panthera uncia]	Panthera uncia	578	578	0.56	4e-08	4151	109	XP_049477030.1
TPA: salivary androgen-binding protein beta subunit-like [Bos taurus]	Bos taurus	582	582	0.58	5e-08	4364	130	DAA19847.1
hypothetical protein C7A07_27215 [Pseudomonas fragi]	Pseudomonas fragi	566	566	0.6	5e-08	4211	75	PRW95432.1
