# Supplementary material for: Slowly Making Sense: A Review of the Two-Step Venom System within Slow (Nycticebus spp.) and Pygmy Lorises (Xanthonycticebus spp.)
Source: Toxins (Basel). 2023 Aug 22;15(9):514. doi: 10.3390/toxins15090514 (PMC10536643; doi:10.3390/toxins15090514)
Supplement: Supplementary file 1 [file toxins-15-00514-s001.zip › Supplementary File S2 - Slow loris plant species and their toxicity.xlsx]

## Sheet: Sheet 1
Slow loris species	Location	Scientific name	Plant type	Parts eaten by slow loris	Any chemical properties documented?	Which parts?	Description of effects	Reference for slow loris and feeding obseravtion	Reference for chemical composition
Nycticebus bengalensis	Assam, India	Ficus nerifolia	Tree	EX, BR	Medicinal	Leaves	Protection against Ischemia/Reperfusion Injuries	Das, N., Nekaris, K.A.I. and Bhattacharjee, P.C., 2014. Medicinal plant exudativory by the Bengal slow loris Nycticebus bengalensis. Endangered Species Research, 23(2), pp.149-157.	Allahyari, S., Delazar, A. and Najafi, M., 2014. Evaluation of general toxicity, anti-oxidant activity and effects of Ficus carica leaves extract on ischemia/reperfusion injuries in isolated heart of rat. Advanced pharmaceutical bulletin, 4(Suppl 2), p.577.
Nycticebus bengalensis	Assam, India	Terminalia arjuna	Tree	EX, BR	Medicinal	Leaves and Bark	Anti microbial	Das, N., Nekaris, K.A.I. and Bhattacharjee, P.C., 2014. Medicinal plant exudativory by the Bengal slow loris Nycticebus bengalensis. Endangered Species Research, 23(2), pp.149-157.	Aneja, K.R., Sharma, C. and Joshi, R., 2012. Antimicrobial activity of Terminalia arjuna Wight & Arn.: An ethnomedicinal plant against pathogens causing ear infection. Brazilian Journal of otorhinolaryngology, 78(1), pp.68-74.
Nycticebus bengalensis	Assam, India	Altingia excelsa	Tree	EX	Medicinal	Leaves	Anti bacterial	Das, N., Nekaris, K.A.I. and Bhattacharjee, P.C., 2014. Medicinal plant exudativory by the Bengal slow loris Nycticebus bengalensis. Endangered Species Research, 23(2), pp.149-157.	Anwar, R. and Hajardhini, P., 2022. Antibacterial Activity of Gallic Acid from the Leaves of Altingia excelsa Noronha to Enterococcus faecalis. Open Access Macedonian Journal of Medical Sciences, 10(A), pp.1-6.
Nycticebus bengalensis	Trishna Wildlife Sanctuary, northeastern India	Spondias pinnata	Tree	EX	Nontoxic	Bark	Nontoxic	Swapna, N., Radhakrishna, S., Gupta, A.K. and Kumar, A., 2010. Exudativory in the Bengal slow loris (Nycticebus bengalensis) in Trishna Wildlife Sanctuary, Tripura, northeast India. American Journal of Primatology: Official Journal of the American Society of Primatologists, 72(2), pp.113-121.	Attanayake, A.P., 2015. Toxicological investigation of Spondias pinnata (Linn. F.) Kurz.(Family: Anacardiaceae) bark extract in Wistar rats. International Journal of Green Pharmacy (IJGP), 9(1), pp.26-31.
Nycticebus bengalensis	Assam, India	Spondias pinnata	Tree	FR, TL	Nontoxic	Bark	Nontoxic	Das, N., Nekaris, K.A.I. and Bhattacharjee, P.C., 2014. Medicinal plant exudativory by the Bengal slow loris Nycticebus bengalensis. Endangered Species Research, 23(2), pp.149-157.	Attanayake, A.P., 2015. Toxicological investigation of Spondias pinnata (Linn. F.) Kurz.(Family: Anacardiaceae) bark extract in Wistar rats. International Journal of Green Pharmacy (IJGP), 9(1), pp.26-31.
Nycticebus bengalensis	Assam, India	Ficus hispida	Tree	EX, BR	Medicinal	Whole plant	Multiple activties identified but little support given	Das, N., Nekaris, K.A.I. and Bhattacharjee, P.C., 2014. Medicinal plant exudativory by the Bengal slow loris Nycticebus bengalensis. Endangered Species Research, 23(2), pp.149-157.	Badgujar, S.B., Patel, V.V., Bandivdekar, A.H. and Mahajan, R.T., 2014. Traditional uses, phytochemistry and pharmacology of Ficus carica: A review. Pharmaceutical biology, 52(11), pp.1487-1503.
Nycticebus bengalensis	Khao Angrunai Wild-life Sanctuary, Thailand	Parkia spp.	Tree	Flowers?	Toxic	Leaves	Toxic to reproductive system	Pliosungnoen, M. and Savani, T. 2008. Spatial and feeding behavior of the endangered Bengal Slow Loris, Nycticebus bengalensis in Khao Angrunai Wildlife Sanctuary, Thailand. Unpublished Report to the Primate Society of Great Britain, UK.	Costa, B.A., de Oliveira, J.M., Sales, P.A., Lira, S.R.D.S., Silva, S.M.D.S., Costa, L.M., Muratori, M.C. and Costa, A.P., 2013. Systemic and reproductive toxicity induced by Parkia platycephala ethanolic extract in female Wistar rats. Revista Brasileira de Farmacognosia, 23(6), pp.920-926.
Nycticebus bengalensis	Trishna Wildlife Sanctuary, northeastern India	Sterculia villosa	Tree	EX, BR	Medicinal	Bark	Anti Leishmaniasis activity	Swapna, N., Radhakrishna, S., Gupta, A.K. and Kumar, A., 2010. Exudativory in the Bengal slow loris (Nycticebus bengalensis) in Trishna Wildlife Sanctuary, Tripura, northeast India. American Journal of Primatology: Official Journal of the American Society of Primatologists, 72(2), pp.113-121.	Das, A., Das, M.C., Das, N. and Bhattacharjee, S., 2017. Evaluation of the antileishmanial potency, toxicity and phytochemical constituents of methanol bark extract of Sterculia villosa. Pharmaceutical biology, 55(1), pp.998-1009.
Nycticebus bengalensis	Assam, India	Morus indica	Tree	FR	Toxic	Leaves	Tissue damage reported when injected	Das, N., Nekaris, K.A.I. and Bhattacharjee, P.C., 2014. Medicinal plant exudativory by the Bengal slow loris Nycticebus bengalensis. Endangered Species Research, 23(2), pp.149-157.	de Oliveira, A.M., do Nascimento, M.F., Ferreira, M.R.A., de Moura, D.F., dos Santos Souza, T.G., da Silva, G.C., da Silva Ramos, E.H., Paiva, P.M.G., de Medeiros, P.L., da Silva, T.G. and Soares, L.A.L., 2016. Evaluation of acute toxicity, genotoxicity and inhibitory effect on acute inflammation of an ethanol extract of Morus alba L.(Moraceae) in mice. Journal of ethnopharmacology, 194, pp.162-1…
Nycticebus bengalensis	Assam, India	Anthocephalus chinensis	Tree	EX, FR	Medicinal	Leaves	Multiple medicinal activities, bark, leaves	Das, N., Nekaris, K.A.I. and Bhattacharjee, P.C., 2014. Medicinal plant exudativory by the Bengal slow loris Nycticebus bengalensis. Endangered Species Research, 23(2), pp.149-157.	Dwevedi, A., Sharma, K. and Sharma, Y.K., 2015. Cadamba: A miraculous tree having enormous pharmacological implications. Pharmacognosy Reviews, 9(18), p.107.
Nycticebus bengalensis	Trishna Wildlife Sanctuary, northeastern India	Acacia pennata	Tree/Shrub	EX	Medicinal	Leaves	Modulation of apoptotic DNA damage and fragmentation	Swapna, N., Radhakrishna, S., Gupta, A.K. and Kumar, A., 2010. Exudativory in the Bengal slow loris (Nycticebus bengalensis) in Trishna Wildlife Sanctuary, Tripura, northeast India. American Journal of Primatology: Official Journal of the American Society of Primatologists, 72(2), pp.113-121.	EL-Taher, E.M., El-Sherei, M.M., El Dine, R.S., ElNaggar, D.M., Khalil, W.K., Kassem, S.M., Elkhateeb, A. and Kassem, M.E., 2021. Acacia pennata L. leaves: chemical profiling and impact on DNA damage, alteration of genotoxicity—related genes expression and ROS generation in hepatic tissues of acetaminophen treated male rats. Advances in Traditional Medicine, pp.1-9.
Nycticebus bengalensis	Assam, India	Dillenia indica	Tree	EX, NC	Toxic	Leaves	Photosensitizing	Das, N., Nekaris, K.A.I. and Bhattacharjee, P.C., 2014. Medicinal plant exudativory by the Bengal slow loris Nycticebus bengalensis. Endangered Species Research, 23(2), pp.149-157.	Fernandes, F.S., da Silva, G.S., Hilel, A.S., Carvalho, A.C., Remor, K.V., Schlindwein, A.D., Kanis, L.A., Martins, D.F. and Kviecinski, M.R., 2019. Study of the potential adverse effects caused by the dermal application of Dillenia indica L. fruit extract standardized to betulinic acid in rodents. Plos one, 14(5), p.e0217718.
Nycticebus bengalensis	Assam, India	Ficus heterophylla	Liana	BR	Nontoxic	Leaves	Nontoxic	Das, N., Nekaris, K.A.I. and Bhattacharjee, P.C., 2014. Medicinal plant exudativory by the Bengal slow loris Nycticebus bengalensis. Endangered Species Research, 23(2), pp.149-157.	Gregory, M., Divya, B., Mary, R.A., Viji, M.H., Kalaichelvan, V.K. and Palanivel, V., 2013. Anti–ulcer activity of Ficus religiosa leaf ethanolic extract. Asian Pacific journal of tropical biomedicine, 3(7), pp.554-556.
Nycticebus bengalensis	Assam, India	Pothos scandens	Liana	EX	Toxic	Leaves	Strong cytotoxcity	Das, N., Nekaris, K.A.I. and Bhattacharjee, P.C., 2014. Medicinal plant exudativory by the Bengal slow loris Nycticebus bengalensis. Endangered Species Research, 23(2), pp.149-157.	Gupta, S., Singh, S., Gupta, R. and Gurjeet Singh, T., 2018. Pharmacological and Phytochemical Updates on Pothos scandens L. Pharmacognosy Communications, 8(4).
Nycticebus bengalensis	Assam, India	Ficus fistulosa	Tree	EX, FR	Medicinal	Leaves	Anti viral	Das, N., Nekaris, K.A.I. and Bhattacharjee, P.C., 2014. Medicinal plant exudativory by the Bengal slow loris Nycticebus bengalensis. Endangered Species Research, 23(2), pp.149-157.	Hafid, A.F., Permanasari, A.A., Tumewu, L., Adianti, M., Aoki, C., Widyawaruyanti, A., Lusida, M.I. and Hotta, H., 2016. Activities of Ficus fistulosa leave extract and fractions against Hepatitis C Virus. Procedia Chemistry, 18, pp.179-184.
Nycticebus bengalensis	Assam, India	Terminalia chebula	Tree	EX, BR, FR, NC	Nontoxic	Entire plant	Nontoxic	Das, N., Nekaris, K.A.I. and Bhattacharjee, P.C., 2014. Medicinal plant exudativory by the Bengal slow loris Nycticebus bengalensis. Endangered Species Research, 23(2), pp.149-157.	Jafari, M., Naeini, K.M., Lorigooini, Z. and Namjoo, R., 2019. Oral acute and sub-acute toxic effects of hydroalcoholic Terminalia chebula Retz and Achillea wilhelmsii extracts in BALB/c mice. BioMedicine, 9(4).
Nycticebus bengalensis	Trishna Wildlife Sanctuary, northeastern India	Acacia concinna	Climber	EX	Toxic	Exudate	Skin sensativity	Swapna, N., Radhakrishna, S., Gupta, A.K. and Kumar, A., 2010. Exudativory in the Bengal slow loris (Nycticebus bengalensis) in Trishna Wildlife Sanctuary, Tripura, northeast India. American Journal of Primatology: Official Journal of the American Society of Primatologists, 72(2), pp.113-121.	Johnson, W., 2005. Final report of the safety assessment of Acacia catechu gum, Acacia concinna fruit extract, Acacia dealbata leaf extract, Acacia dealbata leaf wax, Acacia decurrens extract, Acacia farnesiana extract, Acacia farnesiana flower wax, Acacia farnesiana gum, Acacia senegal extract, Acacia senegal gum, and Acacia senegal gum extract. International journal of toxicology, 24, pp.75-118.
Nycticebus bengalensis	Assam, India	Ficus benjamina	Tree	EX, BR	Toxic	Entire plant	Skin and muscolsal irritation	Das, N., Nekaris, K.A.I. and Bhattacharjee, P.C., 2014. Medicinal plant exudativory by the Bengal slow loris Nycticebus bengalensis. Endangered Species Research, 23(2), pp.149-157.	Jørs, E., 2003. The prevalence of skin and mucosal symptoms in gardeners handling Ficus benjamina (weeping fig) and Hedera helix (ivy). A cross-sectional study. Ugeskrift for laeger, 165(37), pp.3526-3529.
Nycticebus bengalensis	Assam, India	Spondius mangifera	Tree	EX, FR	Medicinal	Fruit	Anti inflammatory	Das, N., Nekaris, K.A.I. and Bhattacharjee, P.C., 2014. Medicinal plant exudativory by the Bengal slow loris Nycticebus bengalensis. Endangered Species Research, 23(2), pp.149-157.	Khalid, M., Alqarni, M.H., Shoaib, A., Arif, M., Foudah, A.I., Afzal, O., Ali, A., Ali, A., Alqahtani, S.S. and Altamimi, A.S., 2021. Anti-arthritic and anti-inflammatory potential of Spondias mangifera extract fractions: An in silico, in vitro and in vivo approach. Plants, 10(5), p.825.
Nycticebus bengalensis	Trishna Wildlife Sanctuary, northeastern India	Lannea coromandelica	Tree	EX	Nontoxic	Exudate	Nontoxic	Swapna, N., Radhakrishna, S., Gupta, A.K. and Kumar, A., 2010. Exudativory in the Bengal slow loris (Nycticebus bengalensis) in Trishna Wildlife Sanctuary, Tripura, northeast India. American Journal of Primatology: Official Journal of the American Society of Primatologists, 72(2), pp.113-121.	Kumar, K.A., Rao, B.G. and Prabhakar, T., 2019. Evaluation of Acute Toxicity of Plant Gum of Lannea Coromandelica in Mice. Indian Journal of Research in Pharmacy and Biotechnology (IJRPB), 7(2).
Nycticebus bengalensis	Trishna Wildlife Sanctuary, northeastern India	Stereospermum personatum	Tree	BR	Medicinal	Stem (Trunk) and Bark	Anti oxidant and inhibits xanthine oxidase activity which is helpful for coniditions such as gout	Swapna, N., Radhakrishna, S., Gupta, A.K. and Kumar, A., 2010. Exudativory in the Bengal slow loris (Nycticebus bengalensis) in Trishna Wildlife Sanctuary, Tripura, northeast India. American Journal of Primatology: Official Journal of the American Society of Primatologists, 72(2), pp.113-121.	Kumar, U.S., Tiwari, A.K., Reddy, S.V., Aparna, P., Rao, R.J., Ali, A.Z. and Rao, J.M., 2005. Free-Radical-Scavenging and Xanthine Oxidase Inhibitory Constituents from Stereospermum p ersonatum. Journal of natural products, 68(11), pp.1615-1621.
Nycticebus bengalensis	Assam, India	Dysoxylum binectariferum	Tree	EX	Medicinal	Stem (Trunk) and Bark	Anti Leishmaniasis activity	Das, N., Nekaris, K.A.I. and Bhattacharjee, P.C., 2014. Medicinal plant exudativory by the Bengal slow loris Nycticebus bengalensis. Endangered Species Research, 23(2), pp.149-157.	Lakshmi, V., Pandey, K., Kapil, A., Singh, N., Samant, M. and Dube, A., 2007. In vitro and in vivo leishmanicidal activity of Dysoxylum binectariferum and its fractions against Leishmania donovani. Phytomedicine, 14(1), pp.36-42.
Nycticebus bengalensis	Trishna Wildlife Sanctuary, northeastern India	Firmiana colorata	Tree	EX, BR	Medicinal	Leaves	Anti oxidative, anti microbial and anti inflammatory	Swapna, N., Radhakrishna, S., Gupta, A.K. and Kumar, A., 2010. Exudativory in the Bengal slow loris (Nycticebus bengalensis) in Trishna Wildlife Sanctuary, Tripura, northeast India. American Journal of Primatology: Official Journal of the American Society of Primatologists, 72(2), pp.113-121.	Lala, M., 2023. Characterization of Firmiana colorata (Roxb.) leaf extract and its silver nanoparticles reveal their antioxidative, anti-microbial, and anti-inflammatory properties. International Nano Letters, p.1.
Nycticebus bengalensis	Assam, India	Dioscorea bulbifera	Liana	FR, TL	Toxic	Rhizome (roots)	Hepatotoxic	Das, N., Nekaris, K.A.I. and Bhattacharjee, P.C., 2014. Medicinal plant exudativory by the Bengal slow loris Nycticebus bengalensis. Endangered Species Research, 23(2), pp.149-157.	Li, H., Peng, Y. and Zheng, J., 2020. Dioscorea bulbifera L.-induced hepatotoxicity and involvement of metabolic activation of furanoterpenoids. Drug metabolism reviews, 52(4), pp.568-584.
Nycticebus bengalensis	Assam, India	Garcinia kydia	Tree	EX	Medicinal	Leaves	Aids in lipoxygenase inhibition	Das, N., Nekaris, K.A.I. and Bhattacharjee, P.C., 2014. Medicinal plant exudativory by the Bengal slow loris Nycticebus bengalensis. Endangered Species Research, 23(2), pp.149-157.	Lončarić, M., Strelec, I., Moslavac, T., Šubarić, D., Pavić, V. and Molnar, M., 2021. Lipoxygenase inhibition by plant extracts. Biomolecules, 11(2), p.152.
Nycticebus bengalensis	Assam, India	Lannea grandis	Tree	EX, FR	Toxic	Exudate	Proteins capable of inducing pH-dependent electrostatic complex, able to change solubility	Das, N., Nekaris, K.A.I. and Bhattacharjee, P.C., 2014. Medicinal plant exudativory by the Bengal slow loris Nycticebus bengalensis. Endangered Species Research, 23(2), pp.149-157.	Majee, S.K., Bera, K., Raja, W., Ghosh, K., Ray, S. and Ray, B., 2016. Structural highlights of an antioxidative arabinogalactan protein of Lannea grandis gum that stabilizes β-lactoglobulin. Food Hydrocolloids, 61, pp.720-729.
Nycticebus bengalensis	Assam, India	Duabanga grandiflora	Tree	EX	Medicinal	Leaves	Anti viral	Das, N., Nekaris, K.A.I. and Bhattacharjee, P.C., 2014. Medicinal plant exudativory by the Bengal slow loris Nycticebus bengalensis. Endangered Species Research, 23(2), pp.149-157.	Malik, F.Z.A., Allaudin, Z.N., Loh, H.S., Nee, T.K., Hani, H. and Abdullah, R., 2016. Antiviral and virucidal activities of Duabanga grandiflora leaf extract against Pseudorabies virus in vitro. BMC complementary and alternative medicine, 16(1), pp.1-10.
Nycticebus bengalensis	Trishna Wildlife Sanctuary, northeastern India	Careya arborea	Tree	EX, NC, BR	Medicinal	Stem (Trunk) and Bark	Anti Leishmaniasis activity	Swapna, N., Radhakrishna, S., Gupta, A.K. and Kumar, A., 2010. Exudativory in the Bengal slow loris (Nycticebus bengalensis) in Trishna Wildlife Sanctuary, Tripura, northeast India. American Journal of Primatology: Official Journal of the American Society of Primatologists, 72(2), pp.113-121.	Mandal, D., Panda, N., Kumar, S., Banerjee, S., Mandal, N.B. and Sahu, N.P., 2006. A triterpenoid saponin possessing antileishmanial activity from the leaves of Careya arborea. Phytochemistry, 67(2), pp.183-190.
Nycticebus bengalensis	Assam, India	Careya arborea	Tree	EX	Medicinal	Stem (Trunk) and Bark	Anti Leishmaniasis activity	Das, N., Nekaris, K.A.I. and Bhattacharjee, P.C., 2014. Medicinal plant exudativory by the Bengal slow loris Nycticebus bengalensis. Endangered Species Research, 23(2), pp.149-157.	Mandal, D., Panda, N., Kumar, S., Banerjee, S., Mandal, N.B. and Sahu, N.P., 2006. A triterpenoid saponin possessing antileishmanial activity from the leaves of Careya arborea. Phytochemistry, 67(2), pp.183-190.
Nycticebus bengalensis	Trishna Wildlife Sanctuary, northeastern India	Albizia procera	Tree	EX	Medicinal	Leaves and Bark	Analgesic and anti inflammatory	Swapna, N., Radhakrishna, S., Gupta, A.K. and Kumar, A., 2010. Exudativory in the Bengal slow loris (Nycticebus bengalensis) in Trishna Wildlife Sanctuary, Tripura, northeast India. American Journal of Primatology: Official Journal of the American Society of Primatologists, 72(2), pp.113-121.	Mani, S., Duraipandian, C. and Chidambaram, S.B., 2022. Analgesic, anti-inflammatory and acute oral toxicity profile of leaf and bark extracts of Albizia procera. BMC Complementary Medicine and Therapies, 22(1), pp.1-9.
Nycticebus bengalensis	Assam, India	Castanopsis indica	Tree	EX, BR, FR,	Toxic	Seeds	Cytotoxic	Das, N., Nekaris, K.A.I. and Bhattacharjee, P.C., 2014. Medicinal plant exudativory by the Bengal slow loris Nycticebus bengalensis. Endangered Species Research, 23(2), pp.149-157.	Mat, N.B., Assim, Z.B. and Ahmad, F.B., 2017. Chemical Characterization and Biological Activities of Methanol Extract From Castanopsis megacarpa Seeds of Sarawak. Transactions on Science and Technology, 4(3-3), pp.330-335.
Nycticebus bengalensis	Assam, India	Melia azedarach	Tree	EX, BR	Toxic	Fruit	Necorsis of gastic muscles	Das, N., Nekaris, K.A.I. and Bhattacharjee, P.C., 2014. Medicinal plant exudativory by the Bengal slow loris Nycticebus bengalensis. Endangered Species Research, 23(2), pp.149-157.	Méndez, M.D.C., Elias, F., Riet-Correa, F., Gimeno, E.J. and Portiansky, E.L., 2006. Intoxicação experimental com frutos de Melia azedarach (Meliaceae) em suínos. Pesquisa Veterinária Brasileira, 26, pp.26-30.
Nycticebus bengalensis	Assam, India	Castanopsis tribuloides	Tree	EX	Unknown	N/A	N/A	Das, N., Nekaris, K.A.I. and Bhattacharjee, P.C., 2014. Medicinal plant exudativory by the Bengal slow loris Nycticebus bengalensis. Endangered Species Research, 23(2), pp.149-157.	N/A
Nycticebus bengalensis	Assam, India	Dysoxylum procerum	Tree	TL	Unknown	N/A	N/A	Das, N., Nekaris, K.A.I. and Bhattacharjee, P.C., 2014. Medicinal plant exudativory by the Bengal slow loris Nycticebus bengalensis. Endangered Species Research, 23(2), pp.149-157.	N/A
Nycticebus bengalensis	Assam, India	Endospermum chinensis	Tree	TL	Unknown	N/A	N/A	Das, N., Nekaris, K.A.I. and Bhattacharjee, P.C., 2014. Medicinal plant exudativory by the Bengal slow loris Nycticebus bengalensis. Endangered Species Research, 23(2), pp.149-157.	N/A
Nycticebus bengalensis	Assam, India	Ficus rumphii	Tree	EX, BR	Unknown	N/A	N/A	Das, N., Nekaris, K.A.I. and Bhattacharjee, P.C., 2014. Medicinal plant exudativory by the Bengal slow loris Nycticebus bengalensis. Endangered Species Research, 23(2), pp.149-157.	N/A
Nycticebus bengalensis	Assam, India	Ilex godjam	Tree	BR	Unknown	N/A	N/A	Das, N., Nekaris, K.A.I. and Bhattacharjee, P.C., 2014. Medicinal plant exudativory by the Bengal slow loris Nycticebus bengalensis. Endangered Species Research, 23(2), pp.149-157.	N/A
Nycticebus bengalensis	Assam, India	Lagerstroemia reginae	Tree	EX, BR, FR, NC	Unknown	N/A	N/A	Das, N., Nekaris, K.A.I. and Bhattacharjee, P.C., 2014. Medicinal plant exudativory by the Bengal slow loris Nycticebus bengalensis. Endangered Species Research, 23(2), pp.149-157.	N/A
Nycticebus bengalensis	Assam, India	Mangifera sylvatica	Tree	EX, NC	Unknown	N/A	N/A	Das, N., Nekaris, K.A.I. and Bhattacharjee, P.C., 2014. Medicinal plant exudativory by the Bengal slow loris Nycticebus bengalensis. Endangered Species Research, 23(2), pp.149-157.	N/A
Nycticebus bengalensis	Assam, India	Manglietia hookeri	Tree	EX	Unknown	N/A	N/A	Das, N., Nekaris, K.A.I. and Bhattacharjee, P.C., 2014. Medicinal plant exudativory by the Bengal slow loris Nycticebus bengalensis. Endangered Species Research, 23(2), pp.149-157.	N/A
Nycticebus bengalensis	Assam, India	Pegia nitida	Climber	EX, BR	Unknown	N/A	N/A	Das, N., Nekaris, K.A.I. and Bhattacharjee, P.C., 2014. Medicinal plant exudativory by the Bengal slow loris Nycticebus bengalensis. Endangered Species Research, 23(2), pp.149-157.	N/A
Nycticebus bengalensis	Assam, India	Pseudostachyum polymorphum	Tree	TL	Unknown	N/A	N/A	Das, N., Nekaris, K.A.I. and Bhattacharjee, P.C., 2014. Medicinal plant exudativory by the Bengal slow loris Nycticebus bengalensis. Endangered Species Research, 23(2), pp.149-157.	N/A
Nycticebus bengalensis	Assam, India	Spatholobus roxburghii	Liana	EX	Unknown	N/A	N/A	Das, N., Nekaris, K.A.I. and Bhattacharjee, P.C., 2014. Medicinal plant exudativory by the Bengal slow loris Nycticebus bengalensis. Endangered Species Research, 23(2), pp.149-157.	N/A
Nycticebus bengalensis	Assam, India	Vatica lanceaefolia	Tree	EX, NC	Unknown	N/A	N/A	Das, N., Nekaris, K.A.I. and Bhattacharjee, P.C., 2014. Medicinal plant exudativory by the Bengal slow loris Nycticebus bengalensis. Endangered Species Research, 23(2), pp.149-157.	N/A
Nycticebus bengalensis	Assam, India	Vernonia scandens	Liana	NC	Unknown	N/A	N/A	Das, N., Nekaris, K.A.I. and Bhattacharjee, P.C., 2014. Medicinal plant exudativory by the Bengal slow loris Nycticebus bengalensis. Endangered Species Research, 23(2), pp.149-157.	N/A
Nycticebus bengalensis	Trishna Wildlife Sanctuary, northeastern India	Albizia stipulacea	Tree	EX	Unknown	N/A	N/A	Swapna, N., Radhakrishna, S., Gupta, A.K. and Kumar, A., 2010. Exudativory in the Bengal slow loris (Nycticebus bengalensis) in Trishna Wildlife Sanctuary, Tripura, northeast India. American Journal of Primatology: Official Journal of the American Society of Primatologists, 72(2), pp.113-121.	N/A
Nycticebus bengalensis	N/A	Bauhinia spp.	Tree	EX	Medicinal	Leaves	Anti inociceptive (anti pain)	Nekaris, K.A.I., Starr, C.R., Collins, R.L. and Wilson, A., 2010. Comparative ecology of exudate feeding by lorises (Nycticebus, Loris) and pottos (Perodicticus, Arctocebus). The evolution of exudativory in primates, pp.155-168.	Padgaonkar, A.V., Suryavanshi, S.V., Londhe, V.Y. and Kulkarni, Y.A., 2018. Acute toxicity study and anti-nociceptive activity of Bauhinia acuminata Linn. Leaf extracts in experimental animal models. Biomedicine & Pharmacotherapy, 97, pp.60-66.
Nycticebus bengalensis	Assam, India	Dysoxylum grande	Tree	EX	Medicinal	Leaves	Anti microbial	Das, N., Nekaris, K.A.I. and Bhattacharjee, P.C., 2014. Medicinal plant exudativory by the Bengal slow loris Nycticebus bengalensis. Endangered Species Research, 23(2), pp.149-157.	Paritala, V., Chiruvella, K.K., Thammineni, C., Ghanta, R.G. and Mohammed, A., 2015. Phytochemicals and antimicrobial potentials of mahogany family. Revista Brasileira de Farmacognosia, 25(1), pp.61-83.
Nycticebus bengalensis	Assam, India	Garcinia pedunculata	Tree	FR, TL	Medicinal	Fruit	Nontoxic and potentially hepatoprotective	Das, N., Nekaris, K.A.I. and Bhattacharjee, P.C., 2014. Medicinal plant exudativory by the Bengal slow loris Nycticebus bengalensis. Endangered Species Research, 23(2), pp.149-157.	Paul, S., Ali, M.Y., Rumpa, N.E., Tanvir, E.M., Hossen, M.S., Saha, M., Bhoumik, N.C., Gan, S.H. and Khalil, M.I., 2017. Assessment of toxicity and beneficiary effects of garcinia pedunculata on the hematological, biochemical, and histological homeostasis in rats. Evidence-Based Complementary and Alternative Medicine, 2017.
Nycticebus bengalensis	Assam, India	Canarium bengalensis	Tree	EX, BR	Toxic	Seeds and Bark	Rodenticide, may be toxic for prrimates	Das, N., Nekaris, K.A.I. and Bhattacharjee, P.C., 2014. Medicinal plant exudativory by the Bengal slow loris Nycticebus bengalensis. Endangered Species Research, 23(2), pp.149-157.	Pelfrène, A.F., 2010. Rodenticides. In Hayes' Handbook of Pesticide Toxicology (pp. 2153-2217). Academic Press.
Nycticebus bengalensis	Assam, India	Artocarpus chama	Tree	EX, NC	Medicinal	Leaves	Anti inflammatory and anti malarial (Genus wide)	Das, N., Nekaris, K.A.I. and Bhattacharjee, P.C., 2014. Medicinal plant exudativory by the Bengal slow loris Nycticebus bengalensis. Endangered Species Research, 23(2), pp.149-157.	Pereira, V.D.J. and Kaplan, M.A.C., 2013. Artocarpus: um gênero exótico de grande bioatividade. Floresta e Ambiente, 20, pp.1-15.
Nycticebus bengalensis	Assam, India	Artocarpus lakoocha	Tree	EX, FR,BR	Medicinal	Leaves	Anti inflammatory and anti malarial (Genus wide)	Das, N., Nekaris, K.A.I. and Bhattacharjee, P.C., 2014. Medicinal plant exudativory by the Bengal slow loris Nycticebus bengalensis. Endangered Species Research, 23(2), pp.149-157.	Pereira, V.D.J. and Kaplan, M.A.C., 2013. Artocarpus: um gênero exótico de grande bioatividade. Floresta e Ambiente, 20, pp.1-15.
Nycticebus bengalensis	Trishna Wildlife Sanctuary, northeastern India	Dalbergia thomsonii	Climber	BR	Toxic	Leaves	Allergic contact dermatitis (genus wide)	Swapna, N., Radhakrishna, S., Gupta, A.K. and Kumar, A., 2010. Exudativory in the Bengal slow loris (Nycticebus bengalensis) in Trishna Wildlife Sanctuary, Tripura, northeast India. American Journal of Primatology: Official Journal of the American Society of Primatologists, 72(2), pp.113-121.	Piletta, P.A., Hausen, B.M., Pasche-Koo, F., French, L.E., Saurat, J.H. and Hauser, C., 1996. Allergic contact dermatitis to east Indian rosewood (Dalbergia latifolia Roxb.). Journal of the American Academy of Dermatology, 34(2), pp.298-300
Nycticebus bengalensis	weather	Dalbergia assamica	Tree	EX,TL	Toxic	Leaves	Allergic contact dermatitis (genus wide)	Das, N., Nekaris, K.A.I. and Bhattacharjee, P.C., 2014. Medicinal plant exudativory by the Bengal slow loris Nycticebus bengalensis. Endangered Species Research, 23(2), pp.149-157.	Piletta, P.A., Hausen, B.M., Pasche-Koo, F., French, L.E., Saurat, J.H. and Hauser, C., 1996. Allergic contact dermatitis to east Indian rosewood (Dalbergia latifolia Roxb.). Journal of the American Academy of Dermatology, 34(2), pp.298-300
Nycticebus bengalensis	Assam, India	Dalbergia rimosa	Liana	EX	Toxic	Leaves	Allergic contact dermatitis (genus wide)	Das, N., Nekaris, K.A.I. and Bhattacharjee, P.C., 2014. Medicinal plant exudativory by the Bengal slow loris Nycticebus bengalensis. Endangered Species Research, 23(2), pp.149-157.	Piletta, P.A., Hausen, B.M., Pasche-Koo, F., French, L.E., Saurat, J.H. and Hauser, C., 1996. Allergic contact dermatitis to east Indian rosewood (Dalbergia latifolia Roxb.). Journal of the American Academy of Dermatology, 34(2), pp.298-300
Nycticebus bengalensis	Assam, India	Dalbergia stipulacea	Liana	EX	Toxic	Leaves	Allergic contact dermatitis (genus wide)	Das, N., Nekaris, K.A.I. and Bhattacharjee, P.C., 2014. Medicinal plant exudativory by the Bengal slow loris Nycticebus bengalensis. Endangered Species Research, 23(2), pp.149-157.	Piletta, P.A., Hausen, B.M., Pasche-Koo, F., French, L.E., Saurat, J.H. and Hauser, C., 1996. Allergic contact dermatitis to east Indian rosewood (Dalbergia latifolia Roxb.). Journal of the American Academy of Dermatology, 34(2), pp.298-300
Nycticebus bengalensis	Assam, India	Dalbergia volubilis	Liana	EX	Toxic	Leaves	Allergic contact dermatitis (genus wide)	Das, N., Nekaris, K.A.I. and Bhattacharjee, P.C., 2014. Medicinal plant exudativory by the Bengal slow loris Nycticebus bengalensis. Endangered Species Research, 23(2), pp.149-157.	Piletta, P.A., Hausen, B.M., Pasche-Koo, F., French, L.E., Saurat, J.H. and Hauser, C., 1996. Allergic contact dermatitis to east Indian rosewood (Dalbergia latifolia Roxb.). Journal of the American Academy of Dermatology, 34(2), pp.298-300
Nycticebus bengalensis	N/A	Magnolia (Manglietia) spp.	Tree	EX	Toxic	Bark	Hepatotoxic (genus wide)	Nekaris, K.A.I., Starr, C.R., Collins, R.L. and Wilson, A., 2010. Comparative ecology of exudate feeding by lorises (Nycticebus, Loris) and pottos (Perodicticus, Arctocebus). The evolution of exudativory in primates, pp.155-168.	Poivre, M. and Duez, P., 2017. Biological activity and toxicity of the Chinese herb Magnolia officinalis Rehder & E. Wilson (Houpo) and its constituents. Journal of Zhejiang University. Science. B, 18(3), p.194.
Nycticebus bengalensis	Assam, India	Magnolia hodgsonii	Tree	EX, NC	Toxic	Bark	Hepatotoxic (genus wide)	Das, N., Nekaris, K.A.I. and Bhattacharjee, P.C., 2014. Medicinal plant exudativory by the Bengal slow loris Nycticebus bengalensis. Endangered Species Research, 23(2), pp.149-157.	Poivre, M. and Duez, P., 2017. Biological activity and toxicity of the Chinese herb Magnolia officinalis Rehder & E. Wilson (Houpo) and its constituents. Journal of Zhejiang University. Science. B, 18(3), p.194.
Nycticebus bengalensis	Assam, India	Bridelia stipularis	Climber	EX	Toxic	Leaves	Cytotoxic	Das, N., Nekaris, K.A.I. and Bhattacharjee, P.C., 2014. Medicinal plant exudativory by the Bengal slow loris Nycticebus bengalensis. Endangered Species Research, 23(2), pp.149-157.	Puja, S.D., Shahriar, K.R., Hasan, C.M. and Ahsan, M., 2020. Flavonoids from the Leaves of Bridelia stipularis with in Vitro Antioxidant and Cytotoxicity Activity. Pharmacology & Pharmacy, 11(07), pp.137-146.
Nycticebus bengalensis	Assam, India	Ficus benghalensis	Tree	EX, BR	Medicinal	Leaves	insecticidal	Das, N., Nekaris, K.A.I. and Bhattacharjee, P.C., 2014. Medicinal plant exudativory by the Bengal slow loris Nycticebus bengalensis. Endangered Species Research, 23(2), pp.149-157.	Rajput, D., Patil, U.K., Chauhan, D.N., Shah, K. and Chauhan, N.S., 2023. Potentials of natural products in vector-borne diseases management: Current and future perspectives. Natural Products in Vector-Borne Disease Management, pp.1-25.
Nycticebus bengalensis	Trishna Wildlife Sanctuary, northeastern India	Breynia vitis-idaea	Tree	FR	Medicinal	Leaves	Anti oxidative, anti microbial, anti inflammatory and antiviral. Activity against various blood disorders. Aids in treatment of diabeties and cancer	Swapna, N., Radhakrishna, S., Gupta, A.K. and Kumar, A., 2010. Exudativory in the Bengal slow loris (Nycticebus bengalensis) in Trishna Wildlife Sanctuary, Tripura, northeast India. American Journal of Primatology: Official Journal of the American Society of Primatologists, 72(2), pp.113-121.	Saadullah, M., Asif, M., Arif, S. and Kanwal, B., 2022. A Comprehensive Review on Traditional Uses, Chemical Constituents, and Diverse Pharmacological Importance of the Genus Breynia. Rec. Nat Prod, 6, pp.538-549.
Nycticebus bengalensis	Assam, India	Pterospermum acerifolium	Tree	EX,BR, TL	Nontoxic	Flowers	Nontoxic	Das, N., Nekaris, K.A.I. and Bhattacharjee, P.C., 2014. Medicinal plant exudativory by the Bengal slow loris Nycticebus bengalensis. Endangered Species Research, 23(2), pp.149-157.	Senapati, A.K., Swain, S.R. and Satyanarayana, S., 2009. Toxicological Studies Of The Hydroalcoholic Extract Of Pterospermum Acerifolium Flowers.
Nycticebus bengalensis	Assam, India	Mesua ferrea	Tree	EX, FR	Toxic	Flowers	Hepatotoxic	Das, N., Nekaris, K.A.I. and Bhattacharjee, P.C., 2014. Medicinal plant exudativory by the Bengal slow loris Nycticebus bengalensis. Endangered Species Research, 23(2), pp.149-157.	Shirsat, P., AR, Z., Kashikar, R., Athavale, M., Athavale, T., Taware, P., Saldanha, T., Kolhe, S. and Tembhurne, S., 2022. Subacute toxicity study of the ethanolic extract of Mesua ferrea (L.) flowers in rats. Drug and Chemical Toxicology, 45(4), pp.1570-1577.
Nycticebus bengalensis	Assam, India	Entada phaseoloides	Liana	EX	Toxic	Seeds	Trypsin and chymotrypsin inhibitor, hemolytic and casues death in model animals	Das, N., Nekaris, K.A.I. and Bhattacharjee, P.C., 2014. Medicinal plant exudativory by the Bengal slow loris Nycticebus bengalensis. Endangered Species Research, 23(2), pp.149-157.	Siddhuraju, P., Becker, K. and Makkar, H.P.S., 2002. Chemical composition, protein fractionation, essential amino acid potential and antimetabolic constituents of an unconventional legume, Gila bean (Entada phaseoloides Merrill) seed kernel. Journal of the Science of Food and Agriculture, 82(2), pp.192-202.
Nycticebus bengalensis	Trishna Wildlife Sanctuary, northeastern India	Terminalia belerica	Tree	EX, BR	Nontoxic	Fruit	Nontoxic	Swapna, N., Radhakrishna, S., Gupta, A.K. and Kumar, A., 2010. Exudativory in the Bengal slow loris (Nycticebus bengalensis) in Trishna Wildlife Sanctuary, Tripura, northeast India. American Journal of Primatology: Official Journal of the American Society of Primatologists, 72(2), pp.113-121.	Sireeratawong, S., Jaijoy, K., Panunto, W., Nanna, U., Lertprasertsuke, N. and Soonthornchareonnon, N., 2013. Acute and chronic toxicity studies of the water extract from dried fruits of Terminalia bellerica (Gaertn.) Roxb. In Spargue-Dawley rats. African Journal of Traditional, Complementary and Alternative Medicines, 10(2), pp.223-231.
Nycticebus bengalensis	Assam, India	Antidesma diandrum	Tree	EX, TL	Nontoxic	N/A	Nontoxic	Das, N., Nekaris, K.A.I. and Bhattacharjee, P.C., 2014. Medicinal plant exudativory by the Bengal slow loris Nycticebus bengalensis. Endangered Species Research, 23(2), pp.149-157.	Sireeratawong, S., Thamaree, S., Ingkaninan, K., Piyabhan, P., Vannasiri, S., Khonsung, P., Singhalak, T. and Jaijoy, K., 2012. Evaluation of acute and subacute oral toxicity of the ethanol extract from Antidesma Acidum Retz. African Journal of Traditional, Complementary and Alternative Medicines, 9(4), pp.465-469.
Nycticebus bengalensis	Assam, India	Terminalia myriocarpa	Tree	EX, BR, NC	Medicinal	Leaves	Hepatoprotective	Das, N., Nekaris, K.A.I. and Bhattacharjee, P.C., 2014. Medicinal plant exudativory by the Bengal slow loris Nycticebus bengalensis. Endangered Species Research, 23(2), pp.149-157.	Sobeh, M., Mahmoud, M.F., Hasan, R.A., Abdelfattah, M.A., Osman, S., Rashid, H.O., El-Shazly, A.M. and Wink, M., 2019. Chemical composition, antioxidant and hepatoprotective activities of methanol extracts from leaves of Terminalia bellirica and Terminalia sericea (Combretaceae). PeerJ, 7, p.e6322.
Nycticebus bengalensis	Trishna Wildlife Sanctuary, northeastern India	Dillenia pentagyna	Tree	FR	Medicinal	Leaves	Anti pain and anti inflammatory. Aids in reducing symptoms of fever, diarrhea and thrombosis.	Swapna, N., Radhakrishna, S., Gupta, A.K. and Kumar, A., 2010. Exudativory in the Bengal slow loris (Nycticebus bengalensis) in Trishna Wildlife Sanctuary, Tripura, northeast India. American Journal of Primatology: Official Journal of the American Society of Primatologists, 72(2), pp.113-121.	Sultana, N., Chung, H.J., Emon, N.U., Alam, S., Taki, M.T.I., Rudra, S., Tahamina, A., Alam, R., Ahmed, F. and Mamun, A.A., 2022. Biological functions of Dillenia pentagyna Roxb. Against pain, inflammation, fever, diarrhea, and thrombosis: Evidenced from in vitro, in vivo, and molecular docking study. Frontiers in Nutrition, 9, p.911274.
Nycticebus bengalensis	Trishna Wildlife Sanctuary, northeastern India	Schima wallichii	Tree	BR	Toxic	Leaves	Cytotoxic	Swapna, N., Radhakrishna, S., Gupta, A.K. and Kumar, A., 2010. Exudativory in the Bengal slow loris (Nycticebus bengalensis) in Trishna Wildlife Sanctuary, Tripura, northeast India. American Journal of Primatology: Official Journal of the American Society of Primatologists, 72(2), pp.113-121.	Widiyarti, G. and Tiara, Y., 2018. Antioxidant Activity and Toxicity of Puspa (Schima wallichii) Leaves Extract from Indonesia. Journal of Tropical Life Science, 8(2).
Nycticebus bengalensis	Assam, India	Rhus semialata	Tree	BR, FR, TL	Medicinal	Stem (Branches) and Leaves	Protects skin from several cytotoxic effects, leaves and branches	Das, N., Nekaris, K.A.I. and Bhattacharjee, P.C., 2014. Medicinal plant exudativory by the Bengal slow loris Nycticebus bengalensis. Endangered Species Research, 23(2), pp.149-157.	Woo, H., Kim, H., Shin, S., Shin, J.H., Ryu, D., Park, D. and Jung, E., 2021. Rhus semialata M. extract ameliorate para-phenylenediamine-induced toxicity in keratinocytes. Toxicology Reports, 8, pp.96-105.
Nycticebus bengalensis	Assam, India	Garcinia cowa	Tree	EX	Toxic	Leaves	Vasorelaxing	Das, N., Nekaris, K.A.I. and Bhattacharjee, P.C., 2014. Medicinal plant exudativory by the Bengal slow loris Nycticebus bengalensis. Endangered Species Research, 23(2), pp.149-157.	Yorsin, S., Sriwiriyajan, S. and Chongsa, W., 2023. Vasorelaxing effect of Garcinia cowa leaf extract in rat thoracic aorta and its underlying mechanisms. Journal of Traditional and Complementary Medicine, 13(3), pp.219-225.
Nycticebus bengalensis	Assam, India	Uncaria laevigata	Liana	TL	Medicinal	Stem (Trunk)	Anti hypertension and anti convulsion	Das, N., Nekaris, K.A.I. and Bhattacharjee, P.C., 2014. Medicinal plant exudativory by the Bengal slow loris Nycticebus bengalensis. Endangered Species Research, 23(2), pp.149-157.	Zhang, Q., Zhao, J.J., Xu, J., Feng, F. and Qu, W., 2015. Medicinal uses, phytochemistry and pharmacology of the genus. Uncaria. J Ethnopharmacol, 173, pp.48-80.
Nycticebus bengalensis	Assam, India	Combretum acuminatum	Liana	TL	Medicinal	Leaves and Bark	Anti protozoa	Das, N., Nekaris, K.A.I. and Bhattacharjee, P.C., 2014. Medicinal plant exudativory by the Bengal slow loris Nycticebus bengalensis. Endangered Species Research, 23(2), pp.149-157.	Zofou, D., Kuete, V. and Titanji, V.P., 2013. Antimalarial and other antiprotozoal products from African medicinal plants. Medicinal plant research in Africa, pp.661-709.
Nycticebus coucang	Perak State, West Malaysia	Pometia pinnata	Tree	FR	Toxic	Stem (Trunk) and Bark	Toxic	Wiens, F., Zitzmann, A. and Hussein, N.A., 2006. Fast food for slow lorises: Is low metabolism related to secondary compounds in high-energy plant diet?. Journal of Mammalogy, 87(4), pp.790-798.	Rohmawati, D. and Sutoyo, S., 2018, September. Steroid isolated from the dichlorometane extract of matoa’s stem bark (Pometia pinnata) and toxicity tests against Artemia salina Leach. In Seminar Nasional Kimia-National Seminar on Chemistry (SNK 2018) (pp. 103-105). Atlantis Press.
Nycticebus coucang	Perak State, West Malaysia	Anacardium occidentale	Tree	EX	Toxic	Leaves	Induces asthenia, anorexia, diarrhoea and syncope	Wiens, F., Zitzmann, A. and Hussein, N.A., 2006. Fast food for slow lorises: Is low metabolism related to secondary compounds in high-energy plant diet?. Journal of Mammalogy, 87(4), pp.790-798.	Tedong, L., Dzeufiet, P.D.D., Dimo, T., Asongalem, E.A., Sokeng, S.D., Flejou, J.F., Callard, P. and Kamtchouing, P., 2007. Acute and subchronic toxicity of Anacardium occidentale Linn (Anacardiaceae) leaves hexane extract in mice. African Journal of Traditional, Complementary and Alternative Medicines, 4(2), pp.140-147.
Nycticebus coucang	Perak State, West Malaysia	Garcinia spp.	Tree	NC	Nontoxic	Entire plant	Nontoxic	Wiens, F., Zitzmann, A. and Hussein, N.A., 2006. Fast food for slow lorises: Is low metabolism related to secondary compounds in high-energy plant diet?. Journal of Mammalogy, 87(4), pp.790-798.	Chuah, L.O., Yeap, S.K., Ho, W.Y., Beh, B.K. and Alitheen, N.B., 2012. In vitro and in vivo toxicity of garcinia or hydroxycitric acid: a review. Evidence-Based Complementary and Alternative Medicine, 2012.
Nycticebus coucang	Perak State, West Malaysia	Neo-Uvaria foetida	Tree	EX	Medicinal	Leaves	Anti inflammatory	Wiens, F., Zitzmann, A. and Hussein, N.A., 2006. Fast food for slow lorises: Is low metabolism related to secondary compounds in high-energy plant diet?. Journal of Mammalogy, 87(4), pp.790-798.	Jakobsson, H.E., Jernberg, C., Andersson, A.F., Sjölund-Karlsson, M., Jansson, J.K. and Engstrand, L., 2010. Short-term antibiotic treatment has differing long-term impacts on the human throat and gut microbiome. PloS one, 5(3), p.e9836.
Nycticebus coucang	Perak State, West Malaysia	Elaeis guineensis	Tree	FR	Nontoxic	Leaves	Nontoxic	Wiens, F., Zitzmann, A. and Hussein, N.A., 2006. Fast food for slow lorises: Is low metabolism related to secondary compounds in high-energy plant diet?. Journal of Mammalogy, 87(4), pp.790-798.	Marinova, G. and Batchvarov, V., 2011. Evaluation of the methods for determination of the free radical scavenging activity by DPPH. Bulgarian Journal of Agricultural Science, 17(1), pp.11-24.
Nycticebus coucang	Perak State, West Malaysia	Artocarpus heterophyllus	Tree	FR	Nontoxic	Seeds	Nontoxic	Wiens, F., Zitzmann, A. and Hussein, N.A., 2006. Fast food for slow lorises: Is low metabolism related to secondary compounds in high-energy plant diet?. Journal of Mammalogy, 87(4), pp.790-798.	N/A
Nycticebus coucang	N/A	Albizia spp.	Tree	EX	Unknown	N/A	N/A	Nekaris, K.A.I., Starr, C.R., Collins, R.L. and Wilson, A., 2010. Comparative ecology of exudate feeding by lorises (Nycticebus, Loris) and pottos (Perodicticus, Arctocebus). The evolution of exudativory in primates, pp.155-168.	N/A
Nycticebus coucang	N/A	Paraserianthes spp.	Tree	EX	Unknown	N/A	N/A	Nekaris, K.A.I., Starr, C.R., Collins, R.L. and Wilson, A., 2010. Comparative ecology of exudate feeding by lorises (Nycticebus, Loris) and pottos (Perodicticus, Arctocebus). The evolution of exudativory in primates, pp.155-168.	N/A
Nycticebus coucang	Perak State, West Malaysia	Buchanania sessilifolia	Tree	EX	Unknown	N/A	N/A	Wiens, F., Zitzmann, A. and Hussein, N.A., 2006. Fast food for slow lorises: Is low metabolism related to secondary compounds in high-energy plant diet?. Journal of Mammalogy, 87(4), pp.790-798.	N/A
Nycticebus coucang	Perak State, West Malaysia	Chisocheton macrophyllus	Tree	EX	Unknown	N/A	N/A	Wiens, F., Zitzmann, A. and Hussein, N.A., 2006. Fast food for slow lorises: Is low metabolism related to secondary compounds in high-energy plant diet?. Journal of Mammalogy, 87(4), pp.790-798.	N/A
Nycticebus coucang	Perak State, West Malaysia	Dacryodes rugosa	Tree	EX	Unknown	N/A	N/A	Wiens, F., Zitzmann, A. and Hussein, N.A., 2006. Fast food for slow lorises: Is low metabolism related to secondary compounds in high-energy plant diet?. Journal of Mammalogy, 87(4), pp.790-798.	N/A
Nycticebus coucang	Perak State, West Malaysia	Diospyros kingii	Tree	FR	Unknown	N/A	N/A	Wiens, F., Zitzmann, A. and Hussein, N.A., 2006. Fast food for slow lorises: Is low metabolism related to secondary compounds in high-energy plant diet?. Journal of Mammalogy, 87(4), pp.790-798.	N/A
Nycticebus coucang	Perak State, West Malaysia	Ganua motleyana	Tree	NC	Unknown	N/A	N/A	Wiens, F., Zitzmann, A. and Hussein, N.A., 2006. Fast food for slow lorises: Is low metabolism related to secondary compounds in high-energy plant diet?. Journal of Mammalogy, 87(4), pp.790-798.	N/A
Nycticebus coucang	Perak State, West Malaysia	Gluta curtisii	Tree	EX	Unknown	N/A	N/A	Wiens, F., Zitzmann, A. and Hussein, N.A., 2006. Fast food for slow lorises: Is low metabolism related to secondary compounds in high-energy plant diet?. Journal of Mammalogy, 87(4), pp.790-798.	N/A
Nycticebus coucang	Perak State, West Malaysia	Grewia laevionata	Shrub	FR	Unknown	N/A	N/A	Wiens, F., Zitzmann, A. and Hussein, N.A., 2006. Fast food for slow lorises: Is low metabolism related to secondary compounds in high-energy plant diet?. Journal of Mammalogy, 87(4), pp.790-798.	N/A
Nycticebus coucang	Perak State, West Malaysia	Ilex spp.	Tree	NC	Unknown	N/A	N/A	Wiens, F., Zitzmann, A. and Hussein, N.A., 2006. Fast food for slow lorises: Is low metabolism related to secondary compounds in high-energy plant diet?. Journal of Mammalogy, 87(4), pp.790-798.	N/A
Nycticebus coucang	Perak State, West Malaysia	Ixonanthes icosandra	Tree	FR	Unknown	N/A	N/A	Wiens, F., Zitzmann, A. and Hussein, N.A., 2006. Fast food for slow lorises: Is low metabolism related to secondary compounds in high-energy plant diet?. Journal of Mammalogy, 87(4), pp.790-798.	N/A
Nycticebus coucang	Perak State, West Malaysia	Mangifera griffithii	Tree	EX	Unknown	N/A	N/A	Wiens, F., Zitzmann, A. and Hussein, N.A., 2006. Fast food for slow lorises: Is low metabolism related to secondary compounds in high-energy plant diet?. Journal of Mammalogy, 87(4), pp.790-798.	N/A
Nycticebus coucang	Perak State, West Malaysia	Ocrantomelon dao	Tree	EX	Unknown	N/A	N/A	Wiens, F., Zitzmann, A. and Hussein, N.A., 2006. Fast food for slow lorises: Is low metabolism related to secondary compounds in high-energy plant diet?. Journal of Mammalogy, 87(4), pp.790-798.	N/A
Nycticebus coucang	Perak State, West Malaysia	Planchonella obovata	Tree	NC	Unknown	N/A	N/A	Wiens, F., Zitzmann, A. and Hussein, N.A., 2006. Fast food for slow lorises: Is low metabolism related to secondary compounds in high-energy plant diet?. Journal of Mammalogy, 87(4), pp.790-798.	N/A
Nycticebus coucang	Perak State, West Malaysia	Prunus polystachya	Tree	EX	Unknown	N/A	N/A	Wiens, F., Zitzmann, A. and Hussein, N.A., 2006. Fast food for slow lorises: Is low metabolism related to secondary compounds in high-energy plant diet?. Journal of Mammalogy, 87(4), pp.790-798.	N/A
Nycticebus coucang	Perak State, West Malaysia	Reinwardtiodendron humile	Tree	EX	Unknown	N/A	N/A	Wiens, F., Zitzmann, A. and Hussein, N.A., 2006. Fast food for slow lorises: Is low metabolism related to secondary compounds in high-energy plant diet?. Journal of Mammalogy, 87(4), pp.790-798.	N/A
Nycticebus coucang	Perak State, West Malaysia	Ficus spp.	Tree	FR	Nontoxic	N/A	Variable effects, see entries on specific species	Wiens, F., Zitzmann, A. and Hussein, N.A., 2006. Fast food for slow lorises: Is low metabolism related to secondary compounds in high-energy plant diet?. Journal of Mammalogy, 87(4), pp.790-798.	N/A
Nycticebus coucang	Perak State, West Malaysia	Grewia paniculta	Tree	NC	Toxic and Medicinal	Leaves and Bark	Cytotoxic but also anti bacterial	Wiens, F., Zitzmann, A. and Hussein, N.A., 2006. Fast food for slow lorises: Is low metabolism related to secondary compounds in high-energy plant diet?. Journal of Mammalogy, 87(4), pp.790-798.	Nasrin, M., Dash, P.R. and Ali, M.S., 2015. In Vitro antibacterial and in Vivo cytotoxic activities of Grewia paniculata. Avicenna Journal of Phytomedicine, 5(2), p.98.
Nycticebus coucang	Perak State, West Malaysia	Rhodomyrtus tomentosa	Shrub	FR	Medicinal	Leaves	Anti microbial	Wiens, F., Zitzmann, A. and Hussein, N.A., 2006. Fast food for slow lorises: Is low metabolism related to secondary compounds in high-energy plant diet?. Journal of Mammalogy, 87(4), pp.790-798.	Siriyong, T., Ontong, J.C., Leejae, S., Suwalak, S., Coote, P.J. and Voravuthikunchai, S.P., 2020. In vivo safety assessment of rhodomyrtone, a potent compound, from Rhodomyrtus tomentosa leaf extract. Toxicology reports, 7, pp.919-924.
Nycticebus coucang	Perak State, West Malaysia	Eugeissona tristis	Tree	NC	Alcohol	Nectar	Non-toxic with no observable effects on slow lorises	Wiens, F., Zitzmann, A. and Hussein, N.A., 2006. Fast food for slow lorises: Is low metabolism related to secondary compounds in high-energy plant diet?. Journal of Mammalogy, 87(4), pp.790-798.	Stauffer, F.W., Siegert, S., Silberbauer-Gottsberger, I. and Gottsberger, G., 2016. Floral structure in the Asian palm Eugeissona tristis Griff.(Arecaceae: Calamoideae), and description of a new nectary type in the family. Plant Systematics and Evolution, 302, pp.629-639.
Nycticebus coucang	Perak State, West Malaysia	Buchanania arborescens	Tree	EX	Toxic	Entire plant	Toxic	Wiens, F., Zitzmann, A. and Hussein, N.A., 2006. Fast food for slow lorises: Is low metabolism related to secondary compounds in high-energy plant diet?. Journal of Mammalogy, 87(4), pp.790-798.	Subarnas, A., Diantini, A., Abdulah, R., Zuhrotun, A., Yamazaki, C., Nakazawa, M. and Koyama, H., 2012. Antiproliferative activity of primates-consumed plants against MCF-7 human breast cancer cell lines. E3 J Med Res, 1(4), pp.038-43.
Nycticebus javanicus	Cipicangti, Java	Musa × paradisiaca	Tree	NC	Toxic	Leaves	Variable toxicity	Rode-Margono, E.J., Rademaker, M., Wirdateti, Strijkstra, A. and Nekaris, K.A.I., 2015. Noxious arthropods as potential prey of the venomous Javan slow loris (Nycticebus javanicus) in a West Javan volcanic agricultural system. Journal of Natural History, 49(31-32), pp.1949-1959.	Asuquo, E.G. and Udobi, C.E., 2016. Antibacterial and toxicity studies of the ethanol extract of Musa paradisiaca leaf. Cogent Biology, 2(1), p.1219248.
Nycticebus javanicus	Kemuning Forest, Temanggung Regency, Central Java, Indonesia	Spondias pinnata	Tree	EX	Nontoxic	Bark	Nontoxic	Dewi, T., Imron, M.A., Lukmandaru, G., Hedger, K., Campera, M. and Nekaris, K.A.I., 2022. The sticky tasty: the nutritional content of the exudativorous diet of the Javan slow loris in a lowland forest. Primates, 63(1), pp.93-102.	Attanayake, A.P., 2015. Toxicological investigation of Spondias pinnata (Linn. F.) Kurz.(Family: Anacardiaceae) bark extract in Wistar rats. International Journal of Green Pharmacy (IJGP), 9(1), pp.26-31.
Nycticebus javanicus	Cipicangti, Java	Calliandra sp. cf haematocephala	Tree	NC	Medicinal	Leaves	Anti fungal	Rode-Margono, E.J., Rademaker, M., Wirdateti, Strijkstra, A. and Nekaris, K.A.I., 2015. Noxious arthropods as potential prey of the venomous Javan slow loris (Nycticebus javanicus) in a West Javan volcanic agricultural system. Journal of Natural History, 49(31-32), pp.1949-1959.	Brenner, S.A. and Romeo, J.T., 1986. Fungitoxic effects of nonprotein imino acids on growth of saprophytic fungi isolated from the leaf surface of Calliandra haematocephala. Applied and environmental microbiology, 51(4), pp.690-693.
Nycticebus javanicus	Cipicangti, Java	Diospyros sp. cf kaki	Tree	FR	Nontoxic	N/A	Nontoxic	Rode-Margono, E.J., Rademaker, M., Wirdateti, Strijkstra, A. and Nekaris, K.A.I., 2015. Noxious arthropods as potential prey of the venomous Javan slow loris (Nycticebus javanicus) in a West Javan volcanic agricultural system. Journal of Natural History, 49(31-32), pp.1949-1959.	Ebbo, A.A., Sani, D., Suleiman, M.M., Ahmad, A. and Hassan, A.Z., 2020. Acute and sub-chronic toxicity evaluation of the crude methanolic extract of Diospyros mespiliformis hochst ex a. Dc (ebenaceae) and its fractions. Toxicology reports, 7, pp.1138-1144.
Nycticebus javanicus	Cipicangti, Java	Acacia decurrens	Tree	EX	Medicinal	Exudate	Astringent (skin-conditioning agent)	Rode-Margono, E.J., Rademaker, M., Wirdateti, Strijkstra, A. and Nekaris, K.A.I., 2015. Noxious arthropods as potential prey of the venomous Javan slow loris (Nycticebus javanicus) in a West Javan volcanic agricultural system. Journal of Natural History, 49(31-32), pp.1949-1959.	Johnson, W., 2005. Final report of the safety assessment of Acacia catechu gum, Acacia concinna fruit extract, Acacia dealbata leaf extract, Acacia dealbata leaf wax, Acacia decurrens extract, Acacia farnesiana extract, Acacia farnesiana flower wax, Acacia farnesiana gum, Acacia senegal extract, Acacia senegal gum, and Acacia senegal gum extract. International journal of toxicology, 24, pp.75-118.
Nycticebus javanicus	Kemuning Forest, Temanggung Regency, Central Java, Indonesia	Litsea velutina	Tree	EX	Unknown	N/A	N/A	Dewi, T., Imron, M.A., Lukmandaru, G., Hedger, K., Campera, M. and Nekaris, K.A.I., 2022. The sticky tasty: the nutritional content of the exudativorous diet of the Javan slow loris in a lowland forest. Primates, 63(1), pp.93-102.	N/A
Nycticebus javanicus	N/A	Albizia spp.	Tree	EX	Unknown	N/A	N/A	Nekaris, K.A.I., Starr, C.R., Collins, R.L. and Wilson, A., 2010. Comparative ecology of exudate feeding by lorises (Nycticebus, Loris) and pottos (Perodicticus, Arctocebus). The evolution of exudativory in primates, pp.155-168.	N/A
Nycticebus javanicus	N/A	Arenga spp.	Tree	EX	Unknown	N/A	N/A	Nekaris, K.A.I., Starr, C.R., Collins, R.L. and Wilson, A., 2010. Comparative ecology of exudate feeding by lorises (Nycticebus, Loris) and pottos (Perodicticus, Arctocebus). The evolution of exudativory in primates, pp.155-168.	N/A
Nycticebus javanicus	Cipicangti, Java	Artocarpus heterophyllus	Tree	FR	Nontoxic	Seeds	Nontoxic	Rode-Margono, E.J., Rademaker, M., Wirdateti, Strijkstra, A. and Nekaris, K.A.I., 2015. Noxious arthropods as potential prey of the venomous Javan slow loris (Nycticebus javanicus) in a West Javan volcanic agricultural system. Journal of Natural History, 49(31-32), pp.1949-1959.	N/A
Nycticebus javanicus	Kemuning Forest, Temanggung Regency, Central Java, Indonesia	Dysoxylum gaudichaudianum	Tree	EX	Toxic	Leaves	Cytotoxic	Dewi, T., Imron, M.A., Lukmandaru, G., Hedger, K., Campera, M. and Nekaris, K.A.I., 2022. The sticky tasty: the nutritional content of the exudativorous diet of the Javan slow loris in a lowland forest. Primates, 63(1), pp.93-102.	Ragasa, C.Y., Ng, V.A.S., De Los Reyes, M.M., Mandia, E.H., Oyong, G.G. and Shen, C.C., 2014. Chemical constituents and cytotoxicity of the leaves of Dysoxylum gaudichaudianum (A. Juss.) Miq. Der Pharma Chemica, 6(5), pp.182-187.
Nycticebus javanicus	Kemuning Forest, Temanggung Regency, Central Java, Indonesia	Sterculia urceolata	Tree	EX	Nontoxic	Leaves	Nontoxic	Dewi, T., Imron, M.A., Lukmandaru, G., Hedger, K., Campera, M. and Nekaris, K.A.I., 2022. The sticky tasty: the nutritional content of the exudativorous diet of the Javan slow loris in a lowland forest. Primates, 63(1), pp.93-102.	Saptarini, N.M. and Mustarichie, R., 2020. Acute toxicity of ethanolic extract of hantap (Sterculia urceolata JE Smith) leaves. Drug Invention Today, 14(5).
Nycticebus menagensis	Gunun Tarak Forest Resevre, West Kalimantan	Mallotus spp.	Tree	EX	Nontoxic	Entire plant	Nontoxic	Anirudh, N., Brown, E., Sanchez, K., & Irpiandi, I. (2020). Sexual Differences in Feeding and Foraging of Released Philippine Slow Loris (Nycticebus menagensis). In K. Nekaris & A. Burrows (Eds.), Evolution, Ecology and Conservation of Lorises and Pottos (Cambridge Studies in Biological and Evolutionary Anthropology, pp. 219-227). Cambridge: Cambridge University Press. doi:10.1017/9781108676526.0…	Hasan, M.R., Mondal, M., Sweilam, S.H., Hossain, M.M., Hanif, M.A., Islam, S.M.S., Roy, A.K., Hasan, M.M., Sarkar, C., Mondal, K.R. and Mondal, B., 2022. Acute and Sub-chronic Toxicity Evaluations of Mallotus repandus Stem Methanol Extract in Female Sprague-Dawley Rats.
Nycticebus menagensis	Gunun Tarak Forest Resevre, West Kalimantan	Erycibe spp.	Tree	EX	Toxic	Entire plant	Toxic	Anirudh, N., Brown, E., Sanchez, K., & Irpiandi, I. (2020). Sexual Differences in Feeding and Foraging of Released Philippine Slow Loris (Nycticebus menagensis). In K. Nekaris & A. Burrows (Eds.), Evolution, Ecology and Conservation of Lorises and Pottos (Cambridge Studies in Biological and Evolutionary Anthropology, pp. 219-227). Cambridge: Cambridge University Press. doi:10.1017/9781108676526.0…	Hsu, H.Y., Lin, C.C., Chen, J.Y., Yang, J.J. and Zhang, R., 1998. Toxic effects of Erycibe obtusifolia, a Chinese medicinal herb, in mice. Journal of ethnopharmacology, 62(2), pp.101-105.
Nycticebus menagensis	Gunun Tarak Forest Resevre, West Kalimantan	Bellucia pentamera	Tree	FR	Unknown	N/A	N/A	Anirudh, N., Brown, E., Sanchez, K., & Irpiandi, I. (2020). Sexual Differences in Feeding and Foraging of Released Philippine Slow Loris (Nycticebus menagensis). In K. Nekaris & A. Burrows (Eds.), Evolution, Ecology and Conservation of Lorises and Pottos (Cambridge Studies in Biological and Evolutionary Anthropology, pp. 219-227). Cambridge: Cambridge University Press. doi:10.1017/9781108676526.0…	N/A
Nycticebus menagensis	Gunun Tarak Forest Resevre, West Kalimantan	Calamae spp	Tree	EX	Unknown	N/A	N/A	Anirudh, N., Brown, E., Sanchez, K., & Irpiandi, I. (2020). Sexual Differences in Feeding and Foraging of Released Philippine Slow Loris (Nycticebus menagensis). In K. Nekaris & A. Burrows (Eds.), Evolution, Ecology and Conservation of Lorises and Pottos (Cambridge Studies in Biological and Evolutionary Anthropology, pp. 219-227). Cambridge: Cambridge University Press. doi:10.1017/9781108676526.0…	N/A
Nycticebus menagensis	Gunun Tarak Forest Resevre, West Kalimantan	Eliocarpus spp.	Tree	EX	Unknown	N/A	N/A	Anirudh, N., Brown, E., Sanchez, K., & Irpiandi, I. (2020). Sexual Differences in Feeding and Foraging of Released Philippine Slow Loris (Nycticebus menagensis). In K. Nekaris & A. Burrows (Eds.), Evolution, Ecology and Conservation of Lorises and Pottos (Cambridge Studies in Biological and Evolutionary Anthropology, pp. 219-227). Cambridge: Cambridge University Press. doi:10.1017/9781108676526.0…	N/A
Nycticebus menagensis	Gunun Tarak Forest Resevre, West Kalimantan	Ficus spp.	Tree	FR	Unknown	N/A	N/A	Anirudh, N., Brown, E., Sanchez, K., & Irpiandi, I. (2020). Sexual Differences in Feeding and Foraging of Released Philippine Slow Loris (Nycticebus menagensis). In K. Nekaris & A. Burrows (Eds.), Evolution, Ecology and Conservation of Lorises and Pottos (Cambridge Studies in Biological and Evolutionary Anthropology, pp. 219-227). Cambridge: Cambridge University Press. doi:10.1017/9781108676526.0…	N/A
Nycticebus menagensis	Gunun Tarak Forest Resevre, West Kalimantan	Tetracera akara	Liana	EX	Nontoxic	Rhizome (roots)	Nontoxic	Anirudh, N., Brown, E., Sanchez, K., & Irpiandi, I. (2020). Sexual Differences in Feeding and Foraging of Released Philippine Slow Loris (Nycticebus menagensis). In K. Nekaris & A. Burrows (Eds.), Evolution, Ecology and Conservation of Lorises and Pottos (Cambridge Studies in Biological and Evolutionary Anthropology, pp. 219-227). Cambridge: Cambridge University Press. doi:10.1017/9781108676526.0…	Nair, R.R., 2018. Evaluation of acute and sub-acute oral toxicity of ethanolic root extract of Tetracera akara (Burm. f.) Merr., an ethnomedicinal plant used by the Kani tribe of Kerala. J Tradit Folk Pract, 5(2).
Nycticebus menagensis	Gunun Tarak Forest Resevre, West Kalimantan	Bauhinia spp.	Tree	EX	Medicinal	Leaves	Anti inociceptive (anti pain)	Anirudh, N., Brown, E., Sanchez, K., & Irpiandi, I. (2020). Sexual Differences in Feeding and Foraging of Released Philippine Slow Loris (Nycticebus menagensis). In K. Nekaris & A. Burrows (Eds.), Evolution, Ecology and Conservation of Lorises and Pottos (Cambridge Studies in Biological and Evolutionary Anthropology, pp. 219-227). Cambridge: Cambridge University Press. doi:10.1017/9781108676526.0…	Padgaonkar, A.V., Suryavanshi, S.V., Londhe, V.Y. and Kulkarni, Y.A., 2018. Acute toxicity study and anti-nociceptive activity of Bauhinia acuminata Linn. Leaf extracts in experimental animal models. Biomedicine & Pharmacotherapy, 97, pp.60-66.
Nycticebus menagensis	Gunun Tarak Forest Resevre, West Kalimantan	Belilschmieddia spp.	Tree	EX	Medicinal	Leaves	Anti parasite	Anirudh, N., Brown, E., Sanchez, K., & Irpiandi, I. (2020). Sexual Differences in Feeding and Foraging of Released Philippine Slow Loris (Nycticebus menagensis). In K. Nekaris & A. Burrows (Eds.), Evolution, Ecology and Conservation of Lorises and Pottos (Cambridge Studies in Biological and Evolutionary Anthropology, pp. 219-227). Cambridge: Cambridge University Press. doi:10.1017/9781108676526.0…	Waleguele, C.C., Mba’ning, B.M., Awantu, A.F., Bankeu, J.J., Fongang, Y.S., Ngouela, A.S., Tsamo, E., Sewald, N., Lenta, B.N. and Krause, R.W., 2020. Antiparasitic constituents of Beilschmiedia louisii and Beilschmiedia obscura and some semisynthetic derivatives (Lauraceae). Molecules, 25(12), p.2862.
Xanthnycticebus pygmaeus	Mondulkiri Province, Cambodia	Salacia chinensis	Vine	FR	Toxic	Stem (Vine)	Hypotensive effect	Starr, C. and Nekaris, K.A.I., 2013. Obligate exudativory characterizes the diet of the pygmy slow loris Nycticebus pygmaeus. American Journal of Primatology, 75(10), pp.1054-1061.	Jansakul, C., Jusapalo, N. and Mahattanadul, S., 2003, February. Hypotensive effect of n-butanol extract from stem of Salacia chinensis in rats. In III WOCMAP Congress on Medicinal and Aromatic Plants-Volume 4: Targeted Screening of Medicinal and Aromatic Plants, Economics 678 (pp. 107-114).
Xanthnycticebus spp.	N/A	Saraca spp.	Tree	EX	Nontoxic	Bark	Some hematopoietic and metabolic toxicicty, bark	Nekaris, K.A.I., Starr, C.R., Collins, R.L. and Wilson, A., 2010. Comparative ecology of exudate feeding by lorises (Nycticebus, Loris) and pottos (Perodicticus, Arctocebus). The evolution of exudativory in primates, pp.155-168.	Du, M., Huang, S., Zhang, J., Wang, J., Hu, L. and Jiang, J., 2015. Toxicolological test of saponins from Sapindus mukorossi Gaerth. Open Journal of Forestry, 5(07), p.749.
Xanthnycticebus spp.	N/A	Spondias spp.	Tree	EX	Nontoxic	Bark	Nontoxic	Nekaris, K.A.I., Starr, C.R., Collins, R.L. and Wilson, A., 2010. Comparative ecology of exudate feeding by lorises (Nycticebus, Loris) and pottos (Perodicticus, Arctocebus). The evolution of exudativory in primates, pp.155-168.	Attanayake, A.P., 2015. Toxicological investigation of Spondias pinnata (Linn. F.) Kurz.(Family: Anacardiaceae) bark extract in Wistar rats. International Journal of Green Pharmacy (IJGP), 9(1), pp.26-31.
Xanthnycticebus spp.	N/A	Sapindus spp.	Tree	EX	Nontoxic	N/A	Nontoxic	Nekaris, K.A.I., Starr, C.R., Collins, R.L. and Wilson, A., 2010. Comparative ecology of exudate feeding by lorises (Nycticebus, Loris) and pottos (Perodicticus, Arctocebus). The evolution of exudativory in primates, pp.155-168.	Du, M., Huang, S., Zhang, J., Wang, J., Hu, L. and Jiang, J., 2015. Toxicolological test of saponins from Sapindus mukorossi Gaerth. Open Journal of Forestry, 5(07), p.749.
Xanthnycticebus spp.	N/A	Vernicia spp.	Tree	EX	Toxic	Entire plant	Toxic	Nekaris, K.A.I., Starr, C.R., Collins, R.L. and Wilson, A., 2010. Comparative ecology of exudate feeding by lorises (Nycticebus, Loris) and pottos (Perodicticus, Arctocebus). The evolution of exudativory in primates, pp.155-168.	Lin, T.J., Hsu, C.I., Lee, K.H., Shiu, L.L. and Deng, J.F., 1996. Two outbreaks of acute Tung Nut (Aleurites fordii) poisoning. Journal of Toxicology: Clinical Toxicology, 34(1), pp.87-92.
